# Supplementary material for: A prospective, cross-sectional study to establish age-specific reference intervals for neonates and children in the setting of clinical biochemistry, immunology and haematology: the HAPPI Kids study protocol
Source: PubMed Central journal article supplement — BMJ Open. 2019 Apr 3;9(4):e025897. doi: 10.1136/bmjopen-2018-025897 (PMC6500200; doi:10.1136/bmjopen-2018-025897), 2019-04-03
Supplement: bmjopen-2018-025897.draft_revisions.pdf [file bmjopen-2018-025897.draft_revisions.pdf]

# BMJ Open

BMJ Open is committed to open peer review. As part of this commitment we make the peer review history of every article we publish publicly available.

When an article is published we post the peer reviewers' comments and the authors' responses online. We also post the versions of the paper that were used during peer review. These are the versions that the peer review comments apply to.

The versions of the paper that follow are the versions that were submitted during the peer review process. They are not the versions of record or the final published versions. They should not be cited or distributed as the published version of this manuscript.

BMJ Open is an open access journal and the full, final, typeset and author-corrected version of record of the manuscript is available on our site with no access controls, subscription charges or pay-per-view fees (<http://bmjopen.bmj.com>).

If you have any questions on BMJ Open's open peer review process please email [info.bmjopen@bmj.com](mailto:info.bmjopen@bmj.com)

# BMJ Open

## A prospective, cross-sectional study protocol to establish age-specific reference intervals for neonates and children in the setting of clinical biochemistry, immunology and haematology: The HAPPI Kids study

|                               |                                                                                                                                                                                                                                                                                                                                                                                                                                                                                                                                                                                                                                                                                                                                                                                                                                                                                                                                                                                                                                                                                                          |
|-------------------------------|----------------------------------------------------------------------------------------------------------------------------------------------------------------------------------------------------------------------------------------------------------------------------------------------------------------------------------------------------------------------------------------------------------------------------------------------------------------------------------------------------------------------------------------------------------------------------------------------------------------------------------------------------------------------------------------------------------------------------------------------------------------------------------------------------------------------------------------------------------------------------------------------------------------------------------------------------------------------------------------------------------------------------------------------------------------------------------------------------------|
| Journal:                      | <i>BMJ Open</i>                                                                                                                                                                                                                                                                                                                                                                                                                                                                                                                                                                                                                                                                                                                                                                                                                                                                                                                                                                                                                                                                                          |
| Manuscript ID                 | bmjopen-2018-025897                                                                                                                                                                                                                                                                                                                                                                                                                                                                                                                                                                                                                                                                                                                                                                                                                                                                                                                                                                                                                                                                                      |
| Article Type:                 | Protocol                                                                                                                                                                                                                                                                                                                                                                                                                                                                                                                                                                                                                                                                                                                                                                                                                                                                                                                                                                                                                                                                                                 |
| Date Submitted by the Author: | 10-Aug-2018                                                                                                                                                                                                                                                                                                                                                                                                                                                                                                                                                                                                                                                                                                                                                                                                                                                                                                                                                                                                                                                                                              |
| Complete List of Authors:     | <p>Hoq, Monsurul ; Murdoch Children's Research Institute, Clinical Epidemiology and Biostatistics Unit; The University of Melbourne, Department of Paediatrics</p> <p>Karlaftis, Vicky; Murdoch Children's Research Institute, Haematology Research</p> <p>Mathews, Susan; The Royal Children's Hospital, Department of Biochemistry, Laboratory Services</p> <p>Burgess, Janet; The Royal Children's Hospital, Department of Pathology Collection, Laboratory Services</p> <p>Donath, Susan; Murdoch Children's Research Institute, Clinical Epidemiology and Biostatistics Unit; The University of Melbourne , Department of Paediatrics</p> <p>Carlin, John; Murdoch Children's Research Institute, Clinical Epidemiology and Biostatistics Unit; The University of Melbourne , Department of Paediatrics</p> <p>Monagle, Paul; Murdoch Children's Research Institute, Haematology Research; The University of Melbourne , Department of Paediatrics</p> <p>Ignjatovic, Vera; Murdoch Children's Research Institute, Haematology Research; The University of Melbourne, Department of Paediatrics</p> |
| Keywords:                     | PAEDIATRICS, Neonates, Children, Reference Intervals                                                                                                                                                                                                                                                                                                                                                                                                                                                                                                                                                                                                                                                                                                                                                                                                                                                                                                                                                                                                                                                     |
|                               |                                                                                                                                                                                                                                                                                                                                                                                                                                                                                                                                                                                                                                                                                                                                                                                                                                                                                                                                                                                                                                                                                                          |

SCHOLARONE™  
Manuscripts

1  
2  
3 **A prospective, cross-sectional study protocol to establish age-specific reference intervals for**  
4 **neonates and children in the setting of clinical biochemistry, immunology and haematology: The**  
5 **HAPPI Kids study**  
6  
7  
8  
9

10 **Corresponding Author**

11 Associate Professor Vera Ignjatovic, PhD, B.Sc. (Hons)

12 Co-Group Leader, Haematology Research, Murdoch Children's Research Institute

13 Principal Fellow, Department of Paediatrics, The University of Melbourne  
14  
15  
16

17  
18 Address

19 Haematology Research, Murdoch Children's Research Institute

20 The Royal Children's Hospital

21 50 Flemington Road, Parkville, Victoria, 3052, Australia

22 Tel: +61 3 99366520, Email: vera.ignjatovic@mcri.edu.au  
23  
24  
25  
26  
27

28 **Co-authors**

29 Monsurul Hoq

30  
31 Clinical Epidemiology and Biostatistics Unit, Murdoch Children's Research Institute, Parkville,  
32 Australia; Department of Paediatrics, The University of Melbourne, Parkville, Australia.  
33

34 Email: monsurul.hoq@mcri.edu.au  
35  
36  
37

38 Vicky Karlaftis

39 Haematology Research, Murdoch Children's Research Institute, Parkville, Australia.

40 Email: vasiliki.karlaftis@mcri.edu.au  
41  
42  
43

44 Sue Mathews

45 Department of Biochemistry, Laboratory Services, The Royal Children's Hospital, Australia.

46 Email: Susan.Matthews@rch.org.au  
47  
48  
49

50 Janet Burgess

51 Department of Pathology Collection, Laboratory Services, The Royal Children's Hospital, Parkville,  
52 Australia.  
53

54 Email: Janet.Burgess@rch.org.au  
55  
56  
57

1  
2  
3 Susan Donath

4 Clinical Epidemiology and Biostatistics Unit, Murdoch Children's Research Institute; Parkville,  
5 Australia; Department of Paediatrics, The University of Melbourne; Parkville, Australia.

6  
7 Email: Susan.donath@mcri.edu.au  
8  
9

10 John Carlin

11 Clinical Epidemiology and Biostatistics Unit, Murdoch Children's Research Institute, Parville,  
12 Australia; Department of Paediatrics, The University of Melbourne, Parkville, Australia.

13  
14 Email: john.carlin@mcri.edu.au  
15  
16

17  
18 Paul Monagle

19 Haematology Research, Murdoch Children's Research Institute, Parkville, Australia; Department of  
20 Paediatrics, The University of Melbourne, Parkville, Australia

21  
22 Email: Paul.Monagle@rch.org.au  
23  
24

25  
26 Vera Ignjatovic

27 Haematology Research, Murdoch Children's Research Institute, Parkville, Australia; Department of  
28 Paediatrics, The University of Melbourne, Parkville, Australia.

29  
30 Email: vera.ignjatovic@mcri.edu.au  
31  
32

33  
34 **WORD COUNT: 2792**  
35  
36  
37  
38  
39  
40  
41  
42  
43  
44  
45  
46  
47  
48  
49  
50  
51  
52  
53  
54  
55  
56  
57  
58  
59  
60

**ABSTRACT****Introduction:**

The clinical interpretation of laboratory tests is reliant on reference intervals. However, the accuracy of a reference interval are dependent on the selected reference population, and in paediatrics, the ability of the reference interval to reflect changes associated with growth, age, sex, and ethnicity. Differences in reagent formulations, methodologies, and analyser can also impact on a reference interval. To date, no direct comparison of reference intervals for common analytes using different analysers in children have been published. The Harmonizing Age Pathology Parameters in Kids (HAPPI Kids) study aims to establish age-appropriate reference intervals for commonly used analytes in the routine clinical care of neonates and children, and to determine the feasibility of paediatric reference interval harmonisation by comparing age-appropriate, multiple analytes reference intervals derived by different analysers.

**Methods and analysis:**

The HAPPI Kids study is a prospective cross-sectional study, collecting paediatric blood samples for analysis of commonly requested biochemical, immunological and haematological tests. Venous blood samples are collected from healthy premature neonates (32 to 36 weeks), term neonates (from birth to up to a maximum of 72 hours post-birth), and children aged 30 days to 18 years (undergoing minor day surgical procedures). Blood samples are processed according to standard laboratory procedures and, if not processed immediately, stored at  $-80^{\circ}\text{C}$ . A minimum of 20 samples is analysed for every analyte for neonates and then each year of age until 18 years. Analytical testing is performed according to the standard operating procedures used for clinical samples. Where possible, sample aliquots from the same patients are analysed for an analyte across multiple commercially available analysers.

**Ethics and dissemination:**

The study protocol was approved by The Royal Children's Hospital, Melbourne, Ethics in Human Research Committee (34183 A). The study findings will be published in peer-reviewed journals and shared with clinicians, laboratory-scientists and laboratories.

**Keywords:** paediatrics, neonates, children, reference intervals

## STRENGTHS AND LIMITATIONS OF THIS STUDY

1. The prospective design of the study ensures blood samples are collected from healthy neonates and children aged 30 days to 18 years.
2. Aliquots from the same blood sample are tested for common analytes on multiple commercially available analysers allowing direct head to head comparison.
3. A minimum of 20 samples is analysed for neonates and then each year of age until 18 years with equal numbers of males and females (total 380 samples per analyte).
4. Parametric statistical methods are to be applied for estimating reference intervals that vary continuously with increasing age.
5. Changes associated with age are based on population changes not individual longitudinal testing.

## INTRODUCTION

Reference intervals are important for the correct interpretation of clinical laboratory tests and impact the clinical assessment and care of patients. Reference intervals are used for determining normal versus abnormal for a measurement of interest, and are usually expressed as a range encompassing 95% of the reference population, where lower and upper limits are 2.5<sup>th</sup> and 97.5<sup>th</sup> centile respectively [1].

Obtaining accurate data from a suitable reference population is an essential element in determining reference intervals, and therefore the characteristics of a reference population need to be matched to a “normal” or a healthy population using strict criteria. However, collecting blood samples from children for different laboratory tests is challenging due to the small blood volume that can be safely collected from children [2]. Previously documented paediatric reference interval studies are frequently based on retrospective analysis of laboratory data, prospective sample collection from school children in the community (ie limited age groups) or from paediatric hospitals where children are undergoing minor elective surgery [3-7]. Very few of these studies have included neonates through to 18 years of age [8].

In children, development and growth are among the key challenges in determining reference intervals for different analytes [2]. The dynamic nature of different analytes as children grow and develop influence the representation of paediatric reference intervals, which have often historically been established or partitioned for different age-ranges [8, 9]. This approach can often lead to

1  
2  
3 misdiagnosis, especially when the age of the child that is being investigated is in close proximity to  
4 the borders of the partitions. For example, a child aged three years and 360 days may have clinical  
5 results that would be classified as outside the reference interval of 0 to 4 years for a blood test of  
6 interest, but within reference interval for children aged 4 to 9 years. Hence, the difference of 5 days  
7 results in the test result being labelled as abnormal. Misdiagnosis leads to repeated blood tests for  
8 the child, increased utilisation of health services, and is often associated with anxiety for parents and  
9 children alike. The determination of the age-specific partition points has often been arbitrary and  
10 often there is not an even distribution of the number of reference subjects included across different  
11 partitions. For these and other reasons, the process of determining age-specific reference intervals  
12 for different analytes based on the artificial partitioning of age has been found to be problematic [4].  
13 A possible solution to address the age-related changes in analyte is to constructing age-appropriate  
14 reference intervals considering age as a continuous variable [1, 4, 10].

15  
16  
17  
18  
19  
20  
21  
22 The laboratory test results for most analytes are dependent on the analyser and reagents used for  
23 analysis and therefore, analyser and reagent specific reference intervals should be determined. In  
24 several studies, mathematical algorithms or “transference” mechanisms have been applied to  
25 compare and construct reference intervals for different analysers based on the reference values for  
26 one specific analyser [11, 12]. However, to date, direct comparison of the reference intervals for  
27 common analytes using different analysers has not been undertaken in neonates and children.

28  
29  
30  
31  
32 The Harmonizing Age Pathology Parameters in Kids (HAPPI Kids) study is designed to address the  
33 existing gaps in reference interval studies with prospectively collected blood samples from healthy  
34 neonates and children, from birth until 18 years of age.

## 35 36 37 38 **METHODS AND ANALYSIS**

### 39 40 **The HAPPI Kids study aims**

- 41  
42 • Establish age-appropriate reference intervals for commonly used analytes in clinical practice  
43 in the setting of neonates and children.
- 44  
45 • Determine whether analyser specific differences alter age-appropriate reference intervals  
46 for multiple analytes in order to determine whether paediatric reference intervals can be  
47 harmonised.  
48  
49  
50

### 51 52 **Study design**

53  
54 The HAPPI Kids study is a prospective cross-sectional study for the collection of paediatric blood  
55 samples for commonly requested biochemical, immunological and haematological analysis.  
56

## Study subjects

Healthy premature neonates (32 to 36 weeks), term neonates (from birth up to a maximum of 72 hours post-birth and children aged 30 days to 18 years (undergoing minor day surgical procedures) are recruited based on specific and detailed eligibility criteria in table 1.

**Table 1:** Summary of the inclusion and exclusion criteria at screening

|                           | Inclusion criteria                                                                                                                                                                                                                                                   | Exclusion criteria (any one)                                                                                                                                                                                                                                                                                                                                                                                                    |
|---------------------------|----------------------------------------------------------------------------------------------------------------------------------------------------------------------------------------------------------------------------------------------------------------------|---------------------------------------------------------------------------------------------------------------------------------------------------------------------------------------------------------------------------------------------------------------------------------------------------------------------------------------------------------------------------------------------------------------------------------|
| <b>Age groups</b>         |                                                                                                                                                                                                                                                                      |                                                                                                                                                                                                                                                                                                                                                                                                                                 |
| <b>Premature neonates</b> | <ul style="list-style-type: none"> <li>• Gestational age of 32 to 36 weeks</li> <li>• Generally healthy</li> </ul>                                                                                                                                                   | <ul style="list-style-type: none"> <li>• Presence of systemic abnormalities</li> <li>• Requires interpreter</li> </ul>                                                                                                                                                                                                                                                                                                          |
| <b>Term neonates</b>      | <ul style="list-style-type: none"> <li>• From birth up to the maximum 72 hours post-birth</li> <li>• Gestational age <math>\geq 37</math> weeks</li> <li>• Weight <math>\geq 2500</math> grams</li> <li>• APGAR Score <math>\geq 7</math> at five minutes</li> </ul> |                                                                                                                                                                                                                                                                                                                                                                                                                                 |
| <b>Paediatric</b>         | <ul style="list-style-type: none"> <li>• Attending hospital for minor elective surgery requiring general anaesthetic (30 days to 18 years) OR volunteer to participate in the study after seeing a flyer related to the study (15 to 18 years)</li> </ul>            |                                                                                                                                                                                                                                                                                                                                                                                                                                 |
| <b>Category</b>           |                                                                                                                                                                                                                                                                      |                                                                                                                                                                                                                                                                                                                                                                                                                                 |
| <b>Haematology</b>        |                                                                                                                                                                                                                                                                      | <ul style="list-style-type: none"> <li>• Presence of coagulation disorders</li> <li>• Family history of coagulation disorders</li> <li>• Currently on anticoagulation medication</li> </ul>                                                                                                                                                                                                                                     |
| <b>Immunology</b>         |                                                                                                                                                                                                                                                                      | <ul style="list-style-type: none"> <li>• Presence of immune system disorder or immune deficiency syndrome</li> <li>• Presence of genetic disorder</li> <li>• Presence of rheumatologic disorder</li> <li>• Family history of rheumatologic disorder or immune deficiency syndrome</li> <li>• Infection or a febrile illness within the last 7 days</li> <li>• Hospital admission for intravenous (IV) antibiotics to</li> </ul> |



|                     |  |                                                                                                                                                                                                                                                                                             |
|---------------------|--|---------------------------------------------------------------------------------------------------------------------------------------------------------------------------------------------------------------------------------------------------------------------------------------------|
|                     |  | <p>clear an infection on more than 2 occasions in life</p> <ul style="list-style-type: none"> <li>• Has needed 2 or more months of oral antibiotics more than 2 occasions in their life</li> <li>• Failure to thrive</li> <li>• Recipient of blood products in the last 3 months</li> </ul> |
| <b>Biochemistry</b> |  | <ul style="list-style-type: none"> <li>• History of liver and renal disease</li> <li>• Presence of endocrine diseases</li> <li>• Presence of metabolic disease</li> <li>• Presence of renal disease</li> <li>• Presence of hepatic disease</li> <li>• Failure to thrive</li> </ul>          |

### Participant recruitment and sample collection:

Participant recruitment commenced in February 2015 in four major public hospitals in Melbourne, Australia. Parents or guardians of eligible study participants are approached by Pathology Collection staff at each site and written consent is obtained following a verbal and written explanation of the study and participation requirements. Following patient consent, the Pathology Collection staff interview the parents or guardian using the study questionnaire to confirm study inclusion and exclusion criteria status (table 1) and to assess and document the child's general health.

Three distinct routes of patient recruitment are utilised:

1. Pre-term neonatal samples are collected from "healthy" neonates, born at 32 to 36 weeks, gestation at The Royal Women's Hospital. Samples are collected via direct venepuncture, using a 23-gauge needle into required blood collection tubes. The pre-term neonates do not have any systemic abnormalities, abnormal foetal monitoring and do not require any mechanical ventilation.
2. Term neonatal samples are collected from "healthy" term neonates following routine intramuscular administration of one milligram of vitamin K in the delivery suites at The Royal Women's Hospital, Northern Health and Western Health - Sunshine Hospital. Samples are collected from birth up to a maximum of 72 hours post-birth in hospital via direct venepuncture, using a 23-gauge needle into the required blood collection tubes (Sarstedt). To minimise the number of blood collection procedures performed, the venous sample is also utilised for application to the routine newborn screening Guthrie card.

- 1  
2  
3 3. Blood samples from healthy children aged 30 days to 18 years are collected at The Royal  
4 Children's Hospital, Northern Hospital and Western Health - Sunshine Hospital. The samples  
5 are obtained from "healthy" children prior to minor elective day surgery (e.g. circumcision).  
6 Other than elective surgery, these children are deemed "healthy" and are not receiving any  
7 medications. All children are fasted before their elective surgery.  
8  
9

10  
11 Only one attempt to collect blood per participant, per sample is made during the HAPPI Kids study.  
12 Blood samples are collected into specific tubes required by the analyser manufacturer depending on  
13 the analytes being tested (e.g. serum vs citrate). The participant recruitment and sample collection  
14 are currently on going.  
15  
16

### 17 18 **Sample sizes**

19  
20 A minimum of 20 samples is collected for 19 specific age groups e.g. neonates and every year of life  
21 from 30 days to 18 years[13]. For the biochemical and haematological parameters, a total of 380  
22 samples are analysed. For the immunological analysis, the number of age groups is increased from  
23 19 to 22 (i.e. 0 to 2 months, 2 to 6 months, 6 to 9 months, 9 to 12 months, 12 to 18 months, 18 to 24  
24 months, and every year of life from 3 years to 18 years), equating to a total of 440 samples. For pre-  
25 term neonates, a total of 100 samples are collected to facilitate analysis of 20 samples for each week  
26 of gestation from 32 to 36 weeks.  
27  
28

29  
30 The sample size of 380 or 440 for estimating 95% reference intervals of an analyte using parametric  
31 methods with an even spread across age is considered adequate based on the approach proposed  
32 by Royston [1]. Using a formula for the approximate standard error of the reference limit at the  
33 mean value of age, he suggested 292 as a suitable sample size for constructing a 95% reference  
34 intervals based on restricting the standard error of the limits of the resulting reference intervals to  
35 be no more than 10 percent of the residual standard deviation from the parametric model [1].  
36  
37  
38  
39  
40  
41

### 42 **Sample processing and storage**

43  
44 The blood samples are processed and stored according to the standard procedures based on the  
45 parameters appropriate for the tests being conducted on that sample (e.g. fresh vs frozen).  
46  
47

48 For biochemistry analytes, samples are collected into S-Monovette serum gel tubes (Sarstedt),  
49 centrifuged at 5000rpm and 6 °C for 5 minutes, separated and stored in 400 uL aliquots at -80 °C  
50 within four hours of collection.  
51  
52

53 For immunology analytes, samples are collected into either S-Monovette serum gel tubes (Sarstedt),  
54 or S-Monovette neutral tubes (Sarstedt), depending on the downstream tests. The samples are spun  
55  
56

at 5000rpm and 6 °C for 5 minutes, separated and the resultant serum stored in 400uL aliquots at -80 °C within four hours of collection.

For haematology analytes, samples are collected into S-Monovette citrate 3.2% tubes (Sarstedt). The samples are centrifuged at 3800rpm at room temperature for 5 minutes, and plasma is stored in 500uL aliquots at -80 °C within four hours of collection, using a previously established collection protocol [14].

Samples utilised for determination of blood groups (ABO) and the thalassaemia screen are collected into 500uL S-Monovette EDTA tubes and processed in the laboratory within 24 hours of collection.

Cell count samples are collected in S-Monovette EDTA tubes (Sarstedt) and processed by the laboratory within 3 hours of collection.

### Sample testing

Blood samples collected from the study participants are tested according to documented and accredited standard operating procedures used for the testing of patient samples within the participating laboratories. The biochemical, immunological and haematological analytes tested are listed in table 2. Where indicated (\*), sample aliquots from the same patient are tested for the same analyte using different automated analysers commonly in clinical use to facilitate direct head to head comparison. In addition, where indicated in table 2 (+), aliquots of the same sample are tested in different laboratories using the same analyser type and test method. The sample testing is currently ongoing.

**Table 2:** List of analytes tested for the HAPPI Kids study.

| Analytes        |                         |                                                                       |                                  |
|-----------------|-------------------------|-----------------------------------------------------------------------|----------------------------------|
| Biochemical     | Immunological           | Haematological                                                        | Pre-term                         |
| Sodium**        | Immunoglobulin G*       | Factors: XII, XI, IX, X, II, VII, VIII, V                             | Urea Electrolytes and Creatinine |
| Potassium**     | Immunoglobulin A*       | Inhibitors: Protein C, Protein S, Antithrombin, Alpha-2-macroglobulin | liver function tests             |
| Chloride**      | Immunoglobulin M*       | Von Willebrand factor                                                 | Calcium                          |
| Bicarbonate**   | Rheumatoid factor*      | Collegen binding assay                                                | Magnesium                        |
| Urea**          | Complement component 3* | Ristocetin cofactor assay                                             | Phosphate                        |
| Creatinine **   | Complement component 4* | Activated Partial Thromboplastin Time                                 | Ferritin                         |
| Total Bilirubin | Cystatin C*             | Prothrombin Time                                                      | Activated Partial                |

|                                    |                                           |                                          |                     |
|------------------------------------|-------------------------------------------|------------------------------------------|---------------------|
|                                    |                                           |                                          | Thromboplastin Time |
| Conjugated Bilirubin**             | ANTI-STREPTOLYSIN O TEST*                 | Fibrinogen                               | Prothrombin Time    |
| Alkaline Phosphate**               | Thyroid peroxidase*                       | Thrombin clotting time                   | Fibrinogen          |
| Aspartate Aminotransferase **      | Thyroglobulin*                            | D-Dimers                                 | D-Dimers            |
| Alanine Aminotransferase **        | Iron*                                     | Full Blood Examination and Reticulocytes |                     |
| Gamma-Glutamyl Transferase **      | Ferritin*                                 | Red Cell Folate                          |                     |
| Total Protein**                    | Transferrin*                              | Glucose-6-phosphate dehydrogenase        |                     |
| Albumin**                          | Antinuclear antibody                      | Active B12                               |                     |
| Calcium**                          | Soluble FAS Ligand                        | Total Homocysteine                       |                     |
| Magnesium**                        | Soluble CD25                              | Total B12                                |                     |
| Phosphate**                        | Immunoglobulin E                          | Serum Folate                             |                     |
| Lactate dehydrogenase**            | Classic Haemolytic Complement Pathway     |                                          |                     |
| Creatine Kinase **                 | Alternative Haemolytic Complement Pathway |                                          |                     |
| Lipase**                           | Mannose-binding lectin Complement Pathway |                                          |                     |
| Amylase**                          |                                           |                                          |                     |
| Uric Acid**                        |                                           |                                          |                     |
| Triglycerides **                   |                                           |                                          |                     |
| Cholesterol**                      |                                           |                                          |                     |
| High-density lipoprotein**         |                                           |                                          |                     |
| Thyroid Stimulating Hormone **     |                                           |                                          |                     |
| Free Thyroxine **                  |                                           |                                          |                     |
| Free Triiodothyronine **           |                                           |                                          |                     |
| Anti-Müllerian hormone *           |                                           |                                          |                     |
| Oestradiol*                        |                                           |                                          |                     |
| Sex hormone binding globulin *     |                                           |                                          |                     |
| Dehydroepiandrosterone – Sulphate* |                                           |                                          |                     |
| Cortisol*                          |                                           |                                          |                     |
| Growth Hormone*                    |                                           |                                          |                     |
| Testosterone*                      |                                           |                                          |                     |
| 25-hydroxyvitamin D*               |                                           |                                          |                     |
| High Sensitivity                   |                                           |                                          |                     |

|                                                    |  |  |  |
|----------------------------------------------------|--|--|--|
| Oestradiol*                                        |  |  |  |
| Androstenedione*                                   |  |  |  |
| 17 $\alpha$ -<br>Hydroxyprogesterone *             |  |  |  |
| Insulin-like growth factor<br>1*                   |  |  |  |
| Insulin-like growth factor-<br>binding protein-3 * |  |  |  |

\* Sample aliquots from the same patient are tested for the same analyte using different automated analysers in common clinical use to facilitate direct head to head comparison.

+ Aliquots of the same sample are tested in different laboratories using the same analyser type and test method.

### Data management system

Study data is collected and managed using the REDCap (Research Electronic Data Capture) electronic data capture tools hosted at the Murdoch Children's Research Institute [15]. REDCap is a secure, web-based application designed to support data capture for research studies, providing: 1) an intuitive interface for validated data entry; 2) audit trails for tracking data manipulation and export procedures; 3) automated export procedures for seamless data downloads to common statistical packages; and 4) procedures for importing data from external sources.

### Data analysis

Test results for different analytes will be plotted according to age in order to identify outliers, explore the normality assumption, and to assess the association between analyte and age-specific variability. Following a detailed examination, including assessment of biological implausibility, outliers will to be excluded from analysis. Reference intervals will be constructed using parametric statistical methods in two steps. In the first step, a fractional polynomial regression model of age will be fitted to the mean of normally distributed or log transformed test results of an analyte, using sex as a covariate[16]. In the second steps, the 2.5<sup>th</sup> and 97.5<sup>th</sup> centiles will be estimated using quantile regression where the power variables of age from the fractional polynomial regression model and potential interaction with sex are used as covariates [17]. The 95% confidence interval of the reference intervals will be estimated based on the fitted model of the reference limits. A combination of statistical testing, i.e. goodness of fit and variance component analysis, and clinical expertise will be used to determine the extent to which the reference intervals of an analyte based on different analysers can be compared.

### Study timeframe

The participant recruitment and sample collection commenced on February 2015 and is expected to be completed by August 2021. The testing of samples for 30 biochemical analytes has commenced, while testing of samples for the remaining biochemical analytes and immunological and haematological analytes are currently on going. We plan to complete the testing of sample by February 2021.

### Patient and public involvement

The study was conceived in response to patient complaints about having blood tests done at community pathology laboratories and their children requiring repeat testing because age appropriate normal data was not available. The recruitment and consent processes were piloted and parental/ child feedback incorporated into the main study protocol. A summary of the results will be shared by mail to all the participants involved. If any child has a clinically abnormal result the parents are contacted and appropriate plans for review of the child are made.

### ETHICS AND DISSEMINATION

The study protocol has been approved (34183 A) by The Royal Children's Hospital, Melbourne, Ethics in Human Research Committee (HREC) and subsequently approved by the HREC committees of all participating hospitals including, The Royal Women's Hospital, Northern Health and Western Health - Sunshine Hospital. The study is primarily supported by The Royal Children's Hospital Foundation and is based at the Haematology Research Laboratory, Murdoch Children's Research Institute, Melbourne, Australia.

Written consent is obtained from parents or guardians of eligible study participants following a verbal and written explanation of the study and participation requirements by Pathology Collection staff at each site after. Less than 3% of the blood volume is collected from a child considering the amount of blood volume a child has, while only one attempt is made to minimise risk associated with collecting intravenous blood.

Participant's identifying information is replaced by a study number (ID) at recruitment to maintain confidentiality. This ID has been used in all laboratory specimens, evaluation forms, reports and other records that leaves the site. Electronic data are stored in REDCap which can only be accessed by the authorised members of the research team. Similarly, paper-based information are stored in a locked filing cabinet and can only be accessed by the designated persons. The blood samples are stored in freezers which are only accessible to authorised members of the research team by using their individual swipe card maintaining a record of who has accessed the samples and at what time.

1  
2  
3 All results which will fall outside the final calculated reference range will be reviewed by the  
4 investigators in conjunction with discipline specific advisors. In the cases where the reviewing group  
5 believes that the result is of clinical significance, the families are going to be contacted and the blood  
6 tests are going to be repeated. If necessary, an appropriate referral will be made and the individual  
7 will be followed up by the appropriate specialist.  
8  
9

10  
11 At the conclusion of the study, blood samples collected as part of this study will be destroyed, unless  
12 consent has been given for them to be stored in a biobank located at the Haematology Research  
13 Laboratory for use in future research.  
14  
15

16  
17 The study results will be summarised for submission to peer-reviewed journals. Results will be  
18 shared with participating hospitals and laboratories and presented at local meetings, national and  
19 international conferences.  
20  
21

## 22 **DISCUSSION**

23  
24 Reference intervals are used on a daily basis by clinicians to interpret measurements obtained from  
25 patients [18]. The accuracy and reliability of the reference intervals are highly dependent on the  
26 reference population utilised to define those reference intervals [11, 19]. Harris and Boyed  
27 recommend that characteristics of the sample from the reference population should be similar to  
28 those of the patients [20]. Paediatric reference intervals established by laboratories using  
29 retrospective data mining techniques provide extensive sample numbers. However, the  
30 representativeness of the population is often compromised by using the laboratory results of  
31 children who were initially referred for a significant clinical investigation [8]. Samples collected  
32 prospectively from pre-schools are useful in constructing reference intervals, but are applicable to  
33 pre-school aged children only[6]. Addressing the issue Canadian Initiative in Paediatric Reference  
34 Intervals (CALIPER) and German Health Interview and Examination Survey for Children and Diagnosis  
35 (KiGGS) collected data prospectively using community-based approach ensuring representativeness  
36 [10, 21, 22]. Similarly, the HAPPI Kids study is one of the very few studies collecting data  
37 prospectively from pre-defined healthy preterm neonates and term neonates from birth until 72  
38 hours post birth, as well as children from 30 days to 18 years of age.  
39  
40  
41  
42  
43  
44  
45  
46  
47

48 Samples collected for HAPPI Kids utilise paediatric Pathology Collectors with specific skills and  
49 documented competency to collect venous samples from neonates. All collected samples meet RCH  
50 laboratory standard operating procedures for collection and storage as documented in the Specimen  
51 Collection Handbook (SCH) for the analytes [23]. All participating laboratories perform daily quality  
52 control, participated in external quality assurance programs (Royal College of Pathologists of  
53  
54  
55  
56  
57

1  
2  
3 Australasia Quality Assurance Programs (RCPA QAP)) and were accredited by the National  
4 Association of Testing Authorities (NATA). The prospective design of the HAPPI Kids study also  
5 ensures quality of sample collection, storage and testing in different laboratories.  
6  
7

8 The direct comparison of reference intervals by analysers is not possible using data mining  
9 techniques as the blood sample available might not be enough to test in all available analysers. To  
10 overcome this problem CALIPER program which initially established reference intervals using the  
11 Abbott ARCHITECT analyser transferred reference intervals in line with Clinical & Laboratory  
12 Standards Institute (CLSI) recommendations by testing only 100 samples on Beckman Coulter  
13 DxC800, Ortho Vitros 5600, Roche Cobas 600 and Siemens Vista 1500 using an algorithm [11, 12].  
14 The study used  $r^2 < 0.70$  as an indicator of non-transference between Abbott ARCHITECT and  
15 another platform and reported few analytes as non-transferable between analysers[11]. The  
16 challenges in transference from Abbott ARCHITECT to another analyser were discussed by the  
17 authors including the lack of an appropriate number of samples per age group since only 100  
18 samples were tested to predict the linear relationship [11]. The HAPPI Kids study utilises aliquots of  
19 the same blood sample from the same patient and tests the aliquots on different analysers, enabling  
20 the first documented head to head comparison between analysers for the age-spectrum covering  
21 neonates to children 18 years of age. Therefore, results of the HAPPI Kids study will be very useful in  
22 improving interpretation of pathology results for neonates and children.  
23  
24  
25  
26  
27  
28  
29  
30  
31

## 32 REFERENCE

- 33 1. Royston, P., *Constructing time-specific reference ranges*. Statistics in Medicine, 1991. **10**(5):  
34 p. 675-690.
- 35 2. Coffin, C.M., et al., *Pediatric laboratory medicine: current challenges and future*  
36 *opportunities*. American Journal Of Clinical Pathology, 2002. **117**(5): p. 683-690.
- 37 3. Adeli, K., *Closing the gaps in pediatric reference intervals: The CALIPER initiative*. Clinical  
38 Biochemistry, 2011. **44**(7): p. 480-482.
- 39 4. Loh, T.P., et al., *Development of paediatric biochemistry centile charts as a complement to*  
40 *laboratory reference intervals*. Pathology, 2014. **46**(4): p. 336-43.
- 41 5. *Pediatric reference intervals: Critical gap analysis and establishment of a national initiative*.  
42 Clinical Biochemistry, 2006. **39**(6): p. 559-560.
- 43 6. Southcott, E.K., et al., *Establishment of pediatric reference intervals on a large cohort of*  
44 *healthy children*. Clinica Chimica Acta, 2010. **411**(19-20): p. 1421-1427.
- 45 7. Shaw, J.L.V., et al., *Validity of establishing pediatric reference intervals based on hospital*  
46 *patient data: A comparison of the modified Hoffmann approach to CALIPER reference*  
47 *intervals obtained in healthy children*. Clinical Biochemistry, 2014. **47**(3): p. 166-172.
- 48 8. Colantonio, D.A., et al., *Closing the gaps in pediatric laboratory reference intervals: a*  
49 *CALIPER database of 40 biochemical markers in a healthy and multiethnic population of*  
50 *children*. Clin Chem, 2012. **58**(5): p. 854-68.
- 51 9. Daly, C.H., et al., *A systematic review of statistical methods used in constructing pediatric*  
52 *reference intervals*. Clinical Biochemistry, 2013. **46**(13-14): p. 1220-1227.  
53  
54  
55  
56  
57



10. Kohse, K.P., *KiGGS — The German survey on children's health as data base for reference intervals and beyond*. *Clinical Biochemistry*, 2014. **47**(9): p. 742-743.
11. Estey, M.P., et al., *CLSI-based transference of the CALIPER database of pediatric reference intervals from Abbott to Beckman, Ortho, Roche and Siemens Clinical Chemistry Assays: Direct validation using reference samples from the CALIPER cohort*. *Clinical Biochemistry*, 2013. **46**(13–14): p. 1197-1219.
12. CLSI, *CLSI Releases Guidelines for Defining, Establishing, and Verifying Reference Intervals in the Clinical Laboratory*. 2008, COMTEX News Network, Inc.
13. Ignjatovic, V., et al., *Age-related differences in heparin response*. *Thrombosis Research*, 2006. **118**(6): p. 741-745.
14. Monagle, P., et al., *Developmental haemostasis. Impact for clinical haemostasis laboratories*. *Thromb Haemost*, 2006. **95**(2): p. 362-72.
15. Harris, P.A., et al., *Research Electronic Data Capture (REDCap) - A metadata-driven methodology and workflow process for providing translational research informatics support*. *Journal of biomedical informatics*, 2009. **42**(2): p. 377-381.
16. Royston, P. and E.M. Wright, *A method for estimating age-specific reference intervals ('normal ranges') based on fractional polynomials and exponential transformation*. *Journal of the Royal Statistical Society: Series A (Statistics in Society)*, 1998. **161**(1): p. 79-101.
17. Wei, Y., et al., *Quantile regression methods for reference growth charts*. *Statistics in Medicine*, 2006. **25**(8): p. 1369-1382.
18. Koerbin, G., J.R. Tate, and A.C.f.C.R.I. on behalf of the, *Harmonising Adult Reference Intervals in Australia and New Zealand – the Continuing Story*. *The Clinical Biochemist Reviews*, 2016. **37**(3): p. 121-129.
19. Ritchie, R.F. and G. Palomaki, *Selecting clinically relevant populations for reference intervals*. *Clinical Chemistry And Laboratory Medicine*, 2004. **42**(7): p. 702-709.
20. Forsman, R., *Statistical Bases of Reference Values in Laboratory Medicine*; Eugene K. Harris and James C. Boyd. New York; Marcel Dekker, Inc., 1995. Hardback \$165.00. ISBN 0-8247-9339-0. *Clinical Chemistry*, 1996. **42**(8): p. 1303.
21. Adeli, K., et al., *The Canadian laboratory initiative on pediatric reference intervals: A CALIPER white paper*. *Crit Rev Clin Lab Sci*, 2017. **54**(6): p. 358-413.
22. Ridefelt, P., *Pediatric reference intervals - the Swedish experience*. *Clin Biochem*, 2014. **47**(9): p. 740-1.
23. Melbourne, T.R.C.s.H. *RCH Specimen collection handbook*. Available from: <https://ww2.rch.org.au/specimen/>.

## AUTHOR STATEMENT

MH wrote the manuscript, and developed the statistical analysis plan. VK wrote the study protocol, obtained ethics approval for the study, co-wrote the manuscript and is the co-ordinator of the study. SM provided Biochemistry expertise in the design of the study and revised the manuscript. JB provided pathology collection expertise in the design of the study, training for the pathology collectors and reviewed the manuscript. JC and SD provided support for statistical analysis plan and reviewed the manuscript. PM conceived the study and contributed to its design and was a major contributor in writing the manuscript. VI contributed to the design of the study and was a major contributor in writing the manuscript. All authors read and approved the final manuscript.

**FUNDING**

This study has been primarily funded by The Royal Children's Hospital Foundation (Proposal ID: 2014 – 233), with supplementary funding from Ortho Diagnostics. In addition, the study received in-kind reagents from Roche Diagnostics. Funding bodies do not have any input in the design of the study, sample collection, analysis and interpretation of data and in preparation of the manuscript.

**COMPETING INTERESTS**

The authors declare that they have no competing interests.

**ACKNOWLEDGEMENTS**

The authors are grateful to the parents and children for their participation in this study. The authors thank members of the Pathology Collection Department of The Royal Children's Hospital for the consent of participants and collection of samples. The authors acknowledge the contribution of the members of the anaesthetic and surgical departments of the Royal Children's Hospital, Northern Hospital and Western Health - Sunshine Hospital, Melbourne, for facilitation of sample collection. In addition, the authors thank members of the post-natal departments of The Royal Women's Hospital, Northern Hospital and Western Health, Sunshine Hospital.

# BMJ Open

**A prospective, cross-sectional study to establish age-specific reference intervals for neonates and children in the setting of clinical biochemistry, immunology and haematology: The HAPPI Kids study**

|                                 |                                                                                                                                                                                                                                                                                                                                                                                                                                                                                                                                                                                                                                                                                                                                                                                                                                                                                                                                                                                                                                                                       |
|---------------------------------|-----------------------------------------------------------------------------------------------------------------------------------------------------------------------------------------------------------------------------------------------------------------------------------------------------------------------------------------------------------------------------------------------------------------------------------------------------------------------------------------------------------------------------------------------------------------------------------------------------------------------------------------------------------------------------------------------------------------------------------------------------------------------------------------------------------------------------------------------------------------------------------------------------------------------------------------------------------------------------------------------------------------------------------------------------------------------|
| Journal:                        | <i>BMJ Open</i>                                                                                                                                                                                                                                                                                                                                                                                                                                                                                                                                                                                                                                                                                                                                                                                                                                                                                                                                                                                                                                                       |
| Manuscript ID                   | bmjopen-2018-025897.R1                                                                                                                                                                                                                                                                                                                                                                                                                                                                                                                                                                                                                                                                                                                                                                                                                                                                                                                                                                                                                                                |
| Article Type:                   | Protocol                                                                                                                                                                                                                                                                                                                                                                                                                                                                                                                                                                                                                                                                                                                                                                                                                                                                                                                                                                                                                                                              |
| Date Submitted by the Author:   | 14-Jan-2019                                                                                                                                                                                                                                                                                                                                                                                                                                                                                                                                                                                                                                                                                                                                                                                                                                                                                                                                                                                                                                                           |
| Complete List of Authors:       | Hoq, Monsurul ; Murdoch Children's Research Institute, Clinical Epidemiology and Biostatistics Unit; The University of Melbourne, Department of Paediatrics<br>Karlaftis, Vicky; Murdoch Children's Research Institute, Haematology Research<br>Mathews, Susan; The Royal Children's Hospital, Department of Biochemistry, Laboratory Services<br>Burgess, Janet; The Royal Children's Hospital, Department of Pathology Collection, Laboratory Services<br>Donath, Susan; Murdoch Children's Research Institute, Clinical Epidemiology and Biostatistics Unit; The University of Melbourne , Department of Paediatrics<br>Carlin, John; Murdoch Children's Research Institute, Clinical Epidemiology and Biostatistics Unit; The University of Melbourne , Department of Paediatrics<br>Monagle, Paul; Murdoch Children's Research Institute, Haematology Research; The University of Melbourne , Department of Paediatrics<br>Ignjatovic, Vera; Murdoch Children's Research Institute, Haematology Research; The University of Melbourne, Department of Paediatrics |
| <b>Primary Subject Heading</b>: | Paediatrics                                                                                                                                                                                                                                                                                                                                                                                                                                                                                                                                                                                                                                                                                                                                                                                                                                                                                                                                                                                                                                                           |
| Secondary Subject Heading:      | Paediatrics                                                                                                                                                                                                                                                                                                                                                                                                                                                                                                                                                                                                                                                                                                                                                                                                                                                                                                                                                                                                                                                           |
| Keywords:                       | PAEDIATRICS, Neonates, Children, Reference Intervals                                                                                                                                                                                                                                                                                                                                                                                                                                                                                                                                                                                                                                                                                                                                                                                                                                                                                                                                                                                                                  |
|                                 |                                                                                                                                                                                                                                                                                                                                                                                                                                                                                                                                                                                                                                                                                                                                                                                                                                                                                                                                                                                                                                                                       |

SCHOLARONE™  
Manuscripts

1  
2  
3 **A prospective, cross-sectional study to establish age-specific reference intervals for neonates and**  
4 **children in the setting of clinical biochemistry, immunology and haematology: The HAPPI Kids**  
5 **study**  
6  
7  
8  
9

10  
11 **Corresponding Author**

12 Associate Professor Vera Ignjatovic, PhD, B.Sc. (Hons)

13 Co-Group Leader, Haematology Research, Murdoch Children's Research Institute

14 Principal Fellow, Department of Paediatrics, The University of Melbourne  
15  
16  
17  
18

19 Address

20 Haematology Research, Murdoch Children's Research Institute

21 The Royal Children's Hospital

22 50 Flemington Road, Parkville, Victoria, 3052, Australia

23 Tel: +61 3 99366520, Email: vera.ignjatovic@mcri.edu.au  
24  
25  
26  
27  
28  
29

30 **Co-authors**

31 Monsurul Hoq

32 Clinical Epidemiology and Biostatistics Unit, Murdoch Children's Research Institute, Parkville,  
33 Australia; Department of Paediatrics, The University of Melbourne, Parkville, Australia.  
34  
35  
36

37 Email: monsurul.hoq@mcri.edu.au  
38  
39

40 Vicky Karlaftis

41 Haematology Research, Murdoch Children's Research Institute, Parkville, Australia.

42 Email: vasiliki.karlaftis@mcri.edu.au  
43  
44  
45  
46  
47

48 Sue Mathews

49 Department of Biochemistry, Laboratory Services, The Royal Children's Hospital, Australia.

50 Email: Susan.Matthews@rch.org.au  
51  
52  
53

54 Janet Burgess

55 Department of Pathology Collection, Laboratory Services, The Royal Children's Hospital, Parkville,  
56 Australia.  
57

58 Email: Janet.Burgess@rch.org.au  
59  
60

1  
2  
3 Susan Donath

4 Clinical Epidemiology and Biostatistics Unit, Murdoch Children's Research Institute; Parkville,  
5 Australia; Department of Paediatrics, The University of Melbourne; Parkville, Australia.  
6  
7

8 Email: Susan.donath@mcri.edu.au  
9

10  
11 John Carlin

12 Clinical Epidemiology and Biostatistics Unit, Murdoch Children's Research Institute, Parkville,  
13 Australia; Department of Paediatrics, The University of Melbourne, Parkville, Australia.  
14

15 Email: john.carlin@mcri.edu.au  
16  
17

18  
19 Paul Monagle

20 Haematology Research, Murdoch Children's Research Institute, Parkville, Australia; Department of  
21 Paediatrics, The University of Melbourne, Parkville, Australia  
22

23 Email: Paul.Monagle@rch.org.au  
24  
25

26  
27 Vera Ignjatovic

28 Haematology Research, Murdoch Children's Research Institute, Parkville, Australia; Department of  
29 Paediatrics, The University of Melbourne, Parkville, Australia.  
30

31 Email: vera.ignjatovic@mcri.edu.au  
32  
33

34  
35  
36 **WORD COUNT: 3746**  
37  
38  
39  
40  
41  
42  
43  
44  
45  
46  
47  
48  
49  
50  
51  
52  
53  
54  
55  
56  
57  
58  
59  
60

## ABSTRACT

### Introduction:

The clinical interpretation of laboratory tests is reliant on reference intervals. However, the accuracy of a reference interval is dependent on the selected reference population, and in paediatrics, the ability of the reference interval to reflect changes associated with growth and age, as well as sex and ethnicity. Differences in reagent formulations, methodologies, and analysers can also impact on a reference interval. To date, no direct comparison of reference intervals for common analytes using different analysers in children has been published. The HAPPI Kids study aims to establish age-appropriate reference intervals for commonly used analytes in the routine clinical care of neonates and children, and to determine the feasibility of paediatric reference interval harmonisation by comparing age-appropriate reference intervals in different analysers for multiple analytes.

### Methods and analysis:

The HAPPI Kids study is a prospective cross-sectional study, collecting paediatric blood samples for analysis of commonly requested biochemical, immunological and haematological tests. Venous blood samples are collected from healthy premature neonates (32 to 36 weeks gestation), term neonates (from birth to a maximum of 72 hours post-birth), and children aged 30 days to  $\leq 18$  years (undergoing minor day surgical procedures). Blood samples are processed according to standard laboratory procedures and, if not processed immediately, stored at  $-80^{\circ}\text{C}$ . A minimum of 20 samples is analysed for every analyte for neonates and then each year of age until 18 years. Analytical testing is performed according to the standard operating procedures used for clinical samples. Where possible, sample aliquots from the same patients are analysed for an analyte across multiple commercially available analysers.

### Ethics and dissemination:

The study protocol was approved by The Royal Children's Hospital, Melbourne, Ethics in Human Research Committee (34183 A). The study findings will be published in peer-reviewed journals and shared with clinicians, laboratory-scientists and laboratories.

**Keywords:** paediatrics, neonates, children, reference intervals

## STRENGTHS AND LIMITATIONS OF THIS STUDY

1. The prospective design of the study ensures blood samples are collected from healthy neonates and children aged 30 days to  $\leq 18$  years.
2. Aliquots from the same blood sample are tested for common analytes on multiple commercially available analysers allowing direct head to head comparison.
3. Samples are obtained from a minimum of 20 neonates and then for 20 children within each year of age until 18 years with equal numbers of males and females (total 380 samples per analyte).
4. Parametric statistical methods are to be applied for estimating reference intervals that vary continuously with increasing age.
5. Changes in analytes associated with age are based on samples collected cross-sectionally not based on individuals followed longitudinally.

## INTRODUCTION

Reference intervals are important for the correct interpretation of clinical laboratory tests and affect the clinical assessment and care of patients. Reference intervals are used for determining normal versus abnormal for a measurement of interest, and are usually defined as a range encompassing 95% of the reference population, where lower and upper limits are 2.5<sup>th</sup> and 97.5<sup>th</sup> centile respectively [1].

Obtaining accurate data from a suitable reference population is an essential element in determining reference intervals, and therefore the characteristics of a reference population need to be matched to a “normal” or a healthy population using strict criteria. However, collecting blood samples from children for different laboratory tests is challenging due to the small blood volume that can be safely collected from children and the ethical concern of obtaining blood from healthy children [2]. For these reasons, previously documented paediatric reference interval studies are frequently based on retrospective analysis of laboratory data, prospective sample collection from school children in the community (i.e. limited age groups) or from paediatric hospitals where children are undergoing minor elective surgery [3-7]. Regardless of how the samples are collected, very few of these studies have included neonates through to 18 years of age [8].

In children, development and growth are among the key challenges in determining reference intervals for different analytes [2]. The dynamic nature of different analytes as children grow and develop influences the representation of paediatric reference intervals, which have often historically been

1  
2  
3 established or partitioned for different age-ranges [8, 9]. This approach can often lead to misdiagnosis,  
4 especially when the age of the child that is being investigated is in close proximity to the borders of  
5 the partitions. For example, a child aged three years and 360 days may have clinical results that would  
6 be classified as outside the reference interval of 0 to 4 years for a blood test of interest, but within the  
7 reference interval for children aged 4 to 9 years. Hence, the difference of 5 days results in the test  
8 result being labelled as abnormal. Misdiagnosis leads to repeated blood tests for the child, increased  
9 utilisation of health services, and is often associated with anxiety for parents and children alike. The  
10 determination of the age-specific partition points has often been arbitrary and often there is not an  
11 even distribution of the number of reference subjects included across different partitions. For these  
12 and other reasons, the process of determining age-specific reference intervals for different analytes  
13 based on the artificial partitioning of age has been found to be problematic [4]. A preferred approach,  
14 which addresses the age-related changes in analyte levels, is to construct age-appropriate reference  
15 intervals considering age as a continuous variable [1, 4, 10].

16  
17 The laboratory test results for most analytes are dependent on the analyser and reagents used for  
18 analysis and therefore, analyser- and reagent-specific reference intervals should be determined. In  
19 several studies, mathematical algorithms or “transference” mechanisms have been applied to  
20 compare and construct reference intervals for different analysers based on the reference values for  
21 one specific analyser [11, 12]. However, to date, direct comparison of the reference intervals for  
22 common analytes using different analysers has not been undertaken in neonates and children.

23  
24 The Harmonizing Age Pathology Parameters in Kids (HAPPI Kids) study is designed to address the  
25 existing gaps in reference interval studies with prospectively collected blood samples from healthy  
26 neonates and children, from birth until 18 years of age.

## 27 28 29 30 31 32 33 34 35 36 37 38 39 40 41 42 43 44 45 46 47 **METHODS AND ANALYSIS**

### 48 49 **The HAPPI Kids study: Aims**

- 50  
51 • Establish age-appropriate reference intervals for commonly used analytes in clinical practice  
52 in the setting of neonates and children.
- 53  
54 • Determine whether analyser characteristics alter age-appropriate reference intervals for  
55 multiple analytes, in order to determine whether paediatric reference intervals can be  
56 harmonised.
- 57  
58  
59  
60



## Study design

The HAPPI Kids study is a prospective cross-sectional study for the collection of paediatric blood samples for commonly requested biochemical, immunological and haematological analysis.

## Study subjects

The study subjects consist of healthy premature neonates (32 to 36 weeks gestation), term neonates (from birth up to a maximum of 72 hours post-birth and children aged 30 days to 18 years (undergoing minor day surgical procedures).

## Participant recruitment and sample collection:

Participant recruitment commenced in February 2015 in four major public hospitals in Melbourne, Australia. Parents or guardians of eligible study participants are approached by Pathology Collection staff at each site and written consent is obtained following a verbal and written explanation of the study and participation requirements. Following patient consent, the Pathology Collection staff interview the parents or guardian using the study questionnaire (supplementary table 1) to confirm study inclusion and exclusion criteria status (table 1). In addition, the child's medical record is reviewed to assess and document the child's general health.

Three distinct routes of patient recruitment are utilised:

1. Pre-term neonatal samples are collected from "healthy" neonates about to be discharged from post-natal wards, born at 32 to 36 weeks gestation, at The Royal Women's Hospital. Samples are collected in the first three days of life via direct venepuncture, using a 23-gauge needle, into required blood collection tubes. The pre-term neonates do not have any systemic abnormalities i.e. underlying diseases and comorbidities, abnormal foetal monitoring and do not require any mechanical ventilation.
2. Term neonatal samples are collected from "healthy" term neonates about to be discharged from post-natal wards following routine intramuscular administration of one milligram of vitamin K in the delivery suites at The Royal Women's Hospital, Northern Health and Western Health - Sunshine Hospital. Samples are collected from birth up to a maximum of 72 hours post-birth in hospital via direct venepuncture, using a 23-gauge needle into the required blood collection tubes (Sarstedt). To minimise the number of blood collection procedures performed, the venous sample is also utilised for application to the routine newborn screening Guthrie card.

- 1  
2  
3 3. Blood samples from healthy children aged 30 days to 18 years are collected at The Royal  
4 Children's Hospital, Northern Hospital and Western Health - Sunshine Hospital. The samples  
5 are obtained from "healthy" children prior to minor elective day surgery (e.g. circumcision).  
6  
7 Other than elective surgery, these children are deemed "healthy" and are not receiving any  
8 medications. All children are fasted before their elective surgery.  
9  
10  
11

12 Only one attempt to collect blood per participant, per sample is made during the HAPPI Kids study.  
13 Blood samples are collected into specific tubes required by the analyser manufacturer depending on  
14 the analytes being tested (e.g. serum vs citrate). The participant recruitment and sample collection  
15 are currently on going.  
16  
17  
18  
19

20 **Table 1:** Summary of the inclusion and exclusion criteria at screening  
21

|                           | <b>Inclusion criteria</b>                                                                                                                                                                                                                                            | <b>Exclusion criteria (any one)</b>                                                                                                                                                         |
|---------------------------|----------------------------------------------------------------------------------------------------------------------------------------------------------------------------------------------------------------------------------------------------------------------|---------------------------------------------------------------------------------------------------------------------------------------------------------------------------------------------|
| <b>Age groups</b>         |                                                                                                                                                                                                                                                                      |                                                                                                                                                                                             |
| <b>Premature neonates</b> | <ul style="list-style-type: none"> <li>• Gestational age of 32 to 36 weeks</li> <li>• Generally healthy</li> </ul>                                                                                                                                                   | <ul style="list-style-type: none"> <li>• Presence of systemic abnormalities</li> <li>• Requires interpreter</li> </ul>                                                                      |
| <b>Term neonates</b>      | <ul style="list-style-type: none"> <li>• From birth up to the maximum 72 hours post-birth</li> <li>• Gestational age <math>\geq 37</math> weeks</li> <li>• Weight <math>\geq 2500</math> grams</li> <li>• APGAR Score <math>\geq 7</math> at five minutes</li> </ul> |                                                                                                                                                                                             |
| <b>Paediatric</b>         | <ul style="list-style-type: none"> <li>• Attending hospital for minor elective surgery requiring general anaesthetic (30 days to 18 years) OR volunteer to participate in the study after seeing a flyer related to the study (15 to 18 years)</li> </ul>            |                                                                                                                                                                                             |
| <b>Category</b>           |                                                                                                                                                                                                                                                                      |                                                                                                                                                                                             |
| <b>Haematology</b>        |                                                                                                                                                                                                                                                                      | <ul style="list-style-type: none"> <li>• Presence of coagulation disorders</li> <li>• Family history of coagulation disorders</li> <li>• Currently on anticoagulation medication</li> </ul> |
| <b>Immunology</b>         |                                                                                                                                                                                                                                                                      | <ul style="list-style-type: none"> <li>• Presence of immune system disorder or immune deficiency syndrome</li> <li>• Presence of genetic disorder</li> </ul>                                |

|                     |  |                                                                                                                                                                                                                                                                                                                                                                                                                                                                                                                                                                                                                                                                                                                                                                        |
|---------------------|--|------------------------------------------------------------------------------------------------------------------------------------------------------------------------------------------------------------------------------------------------------------------------------------------------------------------------------------------------------------------------------------------------------------------------------------------------------------------------------------------------------------------------------------------------------------------------------------------------------------------------------------------------------------------------------------------------------------------------------------------------------------------------|
|                     |  | <ul style="list-style-type: none"> <li>• Presence of rheumatologic disorder</li> <li>• Family history of rheumatologic disorder or immune deficiency syndrome</li> <li>• Infection or a febrile illness within the last 7 days</li> <li>• Infection or a febrile illness within the last 4 weeks</li> <li>• Hospital admission for intravenous (IV) antibiotics to clear an infection on more than 2 occasions in life</li> <li>• Has needed 2 or more months of oral antibiotics more than 2 occasions in their life</li> <li>• Failure to thrive</li> <li>• Recipient of blood products in the last 3 months</li> <li>• Diagnosed with food allergy, asthma, eczema or hayfever</li> <li>• Family history of food allergy, asthma, eczema or food allergy</li> </ul> |
| <b>Biochemistry</b> |  | <ul style="list-style-type: none"> <li>• History of liver and renal disease</li> <li>• Presence of endocrine diseases</li> <li>• Presence of metabolic disease</li> <li>• Presence of renal disease</li> <li>• Presence of hepatic disease</li> <li>• Failure to thrive</li> </ul>                                                                                                                                                                                                                                                                                                                                                                                                                                                                                     |

### Sample size

A minimum of 20 samples is collected for 19 specific age groups e.g. neonates and every year of life from 30 days to 18 years [1]. For the biochemical and haematological parameters, a total of 380 samples are analysed. For the immunological analysis, the number of age groups is increased from 19 to 22 (i.e. 1 to 2 months, 2 to 6 months, 6 to 9 months, 9 to 12 months, 12 to 18 months, 18 to 24 months, and every year of life from 3 years to 18 years), equating to a total of 440 samples. For pre-term neonates, a total of 100 samples are collected to facilitate analysis of 20 samples for each week of gestation from 32 to 36 weeks.

The sample size of 380 or 440 for estimating 95% reference intervals of an analyte using parametric methods with samples distributed uniformly across 30 days to < 18 years is considered adequate based on the approach proposed by Royston [1]. Using a formula for the approximate standard error of the reference limit at the mean value of age, he suggested 292 as a suitable sample size for

constructing a 95% reference intervals based on restricting the standard error of the limits of the resulting reference intervals to be no more than 10 percent of the residual standard deviation from the parametric model [1].

### Sample processing and storage

Samples are thawed as per standard clinical laboratory practice for the analyte in question. There are no repeat freeze-thaw cycles for any of the samples. For some analytes the samples are processed immediately and not frozen, within the same time frame and conditions under which clinical samples would be handled. Analytes that can be frozen will be tested in batches. Testing will be done with samples from all ages included in each batch with randomly assigned orders of testing to avoid any batch to batch bias.

For biochemistry analytes, samples are collected into S-Monovette serum gel tubes (Sarstedt), centrifuged at 5000rpm and 6 °C for 5 minutes, separated and stored in 400 µL aliquots at -80 °C within four hours of collection.

For immunology analytes, samples are collected into either S-Monovette serum gel tubes (Sarstedt), or S-Monovette neutral tubes (Sarstedt), depending on the downstream tests. The samples are spun at 5000rpm and 6 °C for 5 minutes, separated and the resultant serum stored in 400µL aliquots at -80 °C within four hours of collection.

For haematology analytes, samples are collected into S-Monovette citrate 3.2% tubes (Sarstedt). The samples are centrifuged at 3800rpm at room temperature for 5 minutes, and plasma is stored in 500µL aliquots at -80 °C within four hours of collection, using a previously established collection protocol [13].

Samples utilised for determination of blood groups (ABO) and the thalassemia screen are collected into 500uL S-Monovette EDTA tubes and processed in the laboratory within 24 hours of collection.

Cell count samples are collected in S-Monovette EDTA tubes (Sarstedt) and processed by the laboratory within 3 hours of collection.

The details of blood tubes used in sample collection is provided in table 2.

**Table 2:** Blood tubes used in sample collection

| Analytes category | Tube Type | Manufacturer | Subtype | Volume | Product Code | Age group |
|-------------------|-----------|--------------|---------|--------|--------------|-----------|
|-------------------|-----------|--------------|---------|--------|--------------|-----------|

|              |                 |          |             |        |             |                        |
|--------------|-----------------|----------|-------------|--------|-------------|------------------------|
| Biochemistry | SST             | Sarstedt | S-Monovette | 7.5 mL | 01.1602.001 | Neonate and Paediatric |
| Haematology  | EDTA            | Sarstedt | S-Monovette | 2.7 mL | 05.1167.001 | Paediatric             |
|              | EDTA            | Sarstedt | Micro Tube  | 0.5 mL | 41.1395.002 | Neonate                |
|              | Sodium Citrate  | Sarstedt | S-Monovette | 3 mL   | 05.1165.100 | Paediatric             |
|              | Sodium Citrate  | Sarstedt | S-Monovette | 1.4 mL | 06.1668.100 | Neonate                |
|              | Lithium Heparin | Sarstedt | S-Monovette | 7.5 mL | 01.1608.001 | Paediatric             |
|              | Lithium Heparin | Sarstedt |             | 0.5 mL | 20.1345     | Neonate                |
| Immunology   | SST             | Sarstedt | S-Monovette | 7.5 mL | 01.1602.001 | Neonate and Paediatric |
|              | Neutral         | Sarstedt | S-Monovette | 7.5 mL | 01.1728.001 | Neonate and Paediatric |

### Sample testing

Blood samples collected from the study participants are tested according to documented and accredited standard operating procedures used for the testing of patient samples within the participating laboratories. The biochemical, immunological and haematological analytes tested are listed in table 3. Where indicated (\*), sample aliquots from the same patient are tested for the same analyte using different automated analysers commonly in clinical use to facilitate direct head to head comparison. In addition, where indicated in table 3 (†), aliquots of the same sample are tested in different laboratories using the same analyser type and test method. The sample testing is currently ongoing.

**Table 3:** List of analytes tested for the HAPPI Kids study.

| Biochemical                | Immunological      | Haematological                                                        |
|----------------------------|--------------------|-----------------------------------------------------------------------|
| Sodium <sup>**†</sup>      | Immunoglobulin G*  | Factors: XII, XI, IX, X, II, VII, VIII, V                             |
| Potassium <sup>**†</sup>   | Immunoglobulin A*  | Inhibitors: Protein C, Protein S, Antithrombin, Alpha-2-macroglobulin |
| Chloride <sup>**†</sup>    | Immunoglobulin M*  | Von Willebrand factor                                                 |
| Bicarbonate <sup>**†</sup> | Rheumatoid factor* | Collegen binding assay                                                |

|                                                |                                           |                                          |
|------------------------------------------------|-------------------------------------------|------------------------------------------|
| Urea**†                                        | Complement component 3*                   | Ristocetin cofactor assay                |
| Creatinine **†                                 | Complement component 4*                   | Activated Partial Thromboplastin Time †  |
| Total Bilirubin †                              | Cystatin C*                               | Prothrombin Time †                       |
| Conjugated Bilirubin**†                        | ANTI-STREPTOLYSIN O TEST*                 | Fibrinogen †                             |
| Alkaline Phosphate**†                          | Thyroid peroxidase*                       | Thrombin clotting time                   |
| Aspartate Aminotransferase **†                 | Thyroglobulin*                            | D-Dimers †                               |
| Alanine Aminotransferase **†                   | Iron*                                     | Full Blood Examination and Reticulocytes |
| Gamma-Glutamyl Transferase **†                 | Ferritin* †                               | Red Cell Folate                          |
| Total Protein**                                | Transferrin*                              | Glucose-6-phosphate dehydrogenase        |
| Albumin**                                      | Antinuclear antibody                      | Active B12                               |
| Calcium**†                                     | Soluble FAS Ligand                        | Total Homocysteine                       |
| Magnesium**†                                   | Soluble CD25                              | Total B12                                |
| Phosphate**†                                   | Immunoglobulin E                          | Serum Folate                             |
| Lactate dehydrogenase**                        | Classic Haemolytic Complement Pathway     |                                          |
| Creatine Kinase **                             | Alternative Haemolytic Complement Pathway |                                          |
| Lipase**                                       | Mannose-binding lectin Complement Pathway |                                          |
| Amylase**                                      |                                           |                                          |
| Uric Acid**                                    |                                           |                                          |
| Triglycerides **                               |                                           |                                          |
| Cholesterol**                                  |                                           |                                          |
| High-density lipoprotein**                     |                                           |                                          |
| Thyroid Stimulating Hormone **                 |                                           |                                          |
| Free Thyroxine **                              |                                           |                                          |
| Free Triiodothyronine **                       |                                           |                                          |
| Anti-Müllerian hormone *                       |                                           |                                          |
| Oestradiol*                                    |                                           |                                          |
| Sex hormone binding globulin *                 |                                           |                                          |
| Dehydroepiandrosterone – Sulphate*             |                                           |                                          |
| Cortisol*                                      |                                           |                                          |
| Growth Hormone*                                |                                           |                                          |
| Testosterone*                                  |                                           |                                          |
| 25-hydroxyvitamin D*                           |                                           |                                          |
| High Sensitivity Oestradiol*                   |                                           |                                          |
| Androstenedione*                               |                                           |                                          |
| 17 $\alpha$ -Hydroxyprogesterone *             |                                           |                                          |
| Insulin-like growth factor 1*                  |                                           |                                          |
| Insulin-like growth factor-binding protein-3 * |                                           |                                          |

\* Sample aliquots from the same patient are tested for the same analyte using different automated analysers in common clinical use to facilitate direct head to head comparison.

+ Aliquots of the same sample are tested in different laboratories using the same analyser type and test method.

1  
2  
3  
4 † Samples from pre term children are tested.  
5

### 6 7 **Data management system**

8  
9 Study data are collected and managed using the REDCap (Research Electronic Data Capture)  
10 electronic data capture system hosted at the Murdoch Children's Research Institute [14]. REDCap is  
11 a secure, web-based application designed to support data capture for research studies, providing: 1)  
12 an intuitive interface for validated data entry; 2) audit trails for tracking data manipulation and  
13 export procedures; 3) automated export procedures for seamless data downloads to common  
14 statistical packages; and 4) procedures for importing data from external sources.  
15  
16  
17  
18

### 19 20 **Data analysis**

21  
22 Test results for different analytes will be plotted according to age in order to identify outliers,  
23 explore normality of distributions, and to assess the association between analyte level and age.  
24 Outliers will to be excluded from analysis following a detailed examination, including visual  
25 inspection, appropriate statistical tests e.g. Tukey's test and assessment of biological implausibility  
26 e.g. haemolysis index for biochemistry samples. Reference intervals will be constructed using  
27 parametric statistical methods in two steps. In the first step, a fractional polynomial regression  
28 model of age will be fitted to the mean of normally distributed or log transformed test results of an  
29 analyte, using sex as a covariate [15]. In the second step, the 2.5<sup>th</sup> and 97.5<sup>th</sup> centiles will be  
30 estimated using quantile regression where the power variables of age from the fractional polynomial  
31 regression model are used as covariates [16]. Potential interaction with sex will be examined. The  
32 95% confidence interval of the reference intervals will be estimated based on the fitted model for  
33 the reference limits. A combination of statistical testing, i.e. goodness of fit and variance component  
34 analysis, and clinical expertise will be used to determine the extent to which the reference intervals  
35 of an analyte based on different analysers can be compared.  
36  
37  
38  
39  
40  
41  
42  
43  
44  
45

46 Stata 15 will be used for data analysis [17].  
47

### 48 49 **Study timeframe**

50  
51 The participant recruitment and sample collection commenced on February 2015 and is expected to  
52 be completed by August 2021. The testing of samples for 30 biochemical analytes has commenced,  
53 while testing of samples for the remaining biochemical analytes and immunological and  
54 haematological analytes are currently on going. We plan to complete the testing of sample by  
55 February 2021.  
56  
57  
58  
59

### 60 **Patient and public involvement**

1  
2  
3 The study was conceived in response to patient complaints about having blood tests done at  
4 community pathology laboratories and their children requiring repeat testing because age-  
5 appropriate normal data was not available. The recruitment and consent processes were piloted and  
6 parental/ child feedback incorporated into the main study protocol. A summary of the results will be  
7 shared by mail with all the participants involved. If any child has a clinically abnormal result the  
8 parents are contacted and appropriate plans for review of the child are made.  
9  
10  
11  
12

### 13 **ETHICS AND DISSEMINATION**

14  
15  
16 The study protocol has been approved (34183 A) by The Royal Children's Hospital, Melbourne, Ethics  
17 in Human Research Committee (HREC) and subsequently approved by the HREC committees of all  
18 participating hospitals including, The Royal Women's Hospital, Northern Health and Western Health  
19 - Sunshine Hospital. The study is primarily supported by The Royal Children's Hospital Foundation  
20 and is based at the Haematology Research Laboratory, Murdoch Children's Research Institute,  
21 Melbourne, Australia.  
22  
23  
24  
25

26  
27 Written consent is obtained from parents or guardians of eligible study participants following a  
28 verbal and written explanation of the study and participation requirements by Pathology Collection  
29 staff at each site after. Less than 3% of the blood volume is collected from a child considering the  
30 amount of blood volume a child has, while only one attempt is made to minimise risk associated  
31 with collecting intravenous blood.  
32  
33  
34  
35

36 Participants' identifying information is replaced by a study number (ID) at recruitment to maintain  
37 confidentiality. This ID is used in all laboratory specimens, evaluation forms, reports and other  
38 records that leaves the site. Electronic data are stored in REDCap which can only be accessed by the  
39 authorised members of the research team. Similarly, paper-based information are stored in a locked  
40 filing cabinet and can only be accessed by the designated persons. The blood samples are stored in  
41 freezers that are only accessible to authorised members of the research team by using their  
42 individual swipe card maintaining a record of who has accessed the samples and at what time.  
43  
44  
45  
46  
47

48 All results that fall outside the existing reference range used by the clinical laboratory are referred  
49 immediately to the study coordinator to determine whether there is any clinical significance that  
50 requires follow-up for the child. If necessary, families are contacted and the blood tests repeated, or  
51 an appropriate referral will be made and the individual will be followed up by the appropriate  
52 specialist.  
53  
54  
55  
56  
57  
58  
59  
60



1  
2  
3 At the conclusion of the study, blood samples collected as part of this study will be destroyed, unless  
4 consent has been given for them to be stored in a biobank located at the Haematology Research  
5 Laboratory for use in future research.  
6  
7

8  
9 The study results will be summarised for submission to peer-reviewed journals. Results will be  
10 shared with participating hospitals and laboratories and presented at local meetings, national and  
11 international conferences.  
12  
13

## 14 **DISCUSSION**

15  
16 Reference intervals are used on a daily basis by clinicians to interpret measurements obtained from  
17 patients [18]. The accuracy and reliability of the reference intervals are highly dependent on the  
18 reference population utilised to define those reference intervals [11, 19]. As recommended by Harris  
19 and Boyd[], the characteristics of the sample from the reference population should be similar to  
20 those of the patients [20]. Paediatric reference intervals established by laboratories using  
21 retrospective data mining techniques provide extensive sample numbers. However, the  
22 representativeness of the population is often compromised by using the laboratory results of  
23 children who were initially referred for a significant clinical investigation [8]. Samples collected  
24 prospectively from pre-schools are useful in constructing reference intervals, but are applicable to  
25 pre-school aged children only [6]. Addressing this issue, the Canadian Initiative in Paediatric  
26 Reference Intervals (CALIPER) and German Health Interview and Examination Survey for Children  
27 and Diagnosis (KiGGS) collected data prospectively using a community-based approach ensuring  
28 representativeness [10, 21, 22]. Similarly, the HAPPI Kids study is one of the very few studies  
29 collecting data prospectively from pre-defined healthy preterm neonates and term neonates from  
30 birth until 72 hours post birth, as well as children from 30 days to 18 years of age.  
31  
32

33 Samples collected for HAPPI Kids utilise paediatric Pathology Collectors with specific skills and  
34 documented competency to collect venous samples from neonates. All collected samples meet RCH  
35 laboratory standard operating procedures for collection and storage as documented in the Specimen  
36 Collection Handbook (SCH) for the analytes [23]. All participating laboratories perform daily quality  
37 control, participated in external quality assurance programs (Royal College of Pathologists of  
38 Australasia Quality Assurance Programs (RCPA QAP)) and were accredited by the National  
39 Association of Testing Authorities (NATA). The prospective design of the HAPPI Kids study also  
40 ensures quality of sample collection, storage and testing in different laboratories.  
41  
42

43 The CLSI recommended sample size for establishing reference intervals for a discrete age group is  
44 120 [12]. However, there is no recommendation for sample size when reference intervals are  
45  
46  
47  
48  
49  
50  
51  
52  
53  
54  
55  
56

constructed for continuous age. Few papers have previously reported continuous reference intervals across childhood and are based on retrospective data mining of samples taken for clinical purposes over many years [4, 24]. No previous studies have collected prospective samples (which were not required for clinical management) from neonates and children specifically screened to be a “well population” for the purpose of developing continuous reference intervals. In that context the exact numbers required remain unknown. Based on Royston’s recommendation our numbers seem appropriate [1]. However, it is our intention to do a simulation study to develop better guidance for appropriate numbers of samples required to allow reliable characterisation of age-specific analyte dynamics.

The direct comparison of reference intervals by analysers is not possible using data mining techniques, nor when testing remainder of clinically driven samples (due to sample aliquot limitations). To overcome this problem CALIPER program which initially established reference intervals using the Abbott ARCHITECT analyser transferred reference intervals in line with Clinical & Laboratory Standards Institute (CLSI) recommendations by testing only 100 samples on Beckman Coulter DxC800, Ortho Vitros 5600, Roche Cobas 600 and Siemens Vista 1500 using an algorithm [11, 12]. The study used  $r^2 < 0.70$  as an indicator of non-transference between Abbott ARCHITECT and another platform and reported several analytes as non-transferable between analysers[11]. The challenges in transference from the Abbott ARCHITECT to another analyser were discussed by the authors including the lack of an appropriate number of samples per age group since only 100 samples were tested to predict the linear relationship [11]. The HAPPI Kids study utilises aliquots of the same blood sample from the same patient and tests the aliquots on different analysers, enabling the first documented head-to-head comparison between analysers for the age spectrum covering neonates to children 18 years of age. Therefore, we expect the results of the HAPPI Kids study to be very useful in improving interpretation of pathology results for neonates and children.

## REFERENCE

1. Royston, P., *Constructing time-specific reference ranges*. *Statistics in Medicine*, 1991. **10**(5): p. 675-690.
2. Coffin, C.M., et al., *Pediatric laboratory medicine: current challenges and future opportunities*. *American Journal Of Clinical Pathology*, 2002. **117**(5): p. 683-690.
3. Adeli, K., *Closing the gaps in pediatric reference intervals: The CALIPER initiative*. *Clinical Biochemistry*, 2011. **44**(7): p. 480-482.
4. Loh, T.P., et al., *Development of paediatric biochemistry centile charts as a complement to laboratory reference intervals*. *Pathology*, 2014. **46**(4): p. 336-43.
5. *Pediatric reference intervals: Critical gap analysis and establishment of a national initiative*. *Clinical Biochemistry*, 2006. **39**(6): p. 559-560.
6. Southcott, E.K., et al., *Establishment of pediatric reference intervals on a large cohort of healthy children*. *Clinica Chimica Acta*, 2010. **411**(19–20): p. 1421-1427.

- 1
- 2
- 3
- 4 7. Shaw, J.L.V., et al., *Validity of establishing pediatric reference intervals based on hospital*
- 5 *patient data: A comparison of the modified Hoffmann approach to CALIPER reference*
- 6 *intervals obtained in healthy children.* Clinical Biochemistry, 2014. **47**(3): p. 166-172.
- 7
- 8 8. Colantonio, D.A., et al., *Closing the gaps in pediatric laboratory reference intervals: a*
- 9 *CALIPER database of 40 biochemical markers in a healthy and multiethnic population of*
- 10 *children.* Clin Chem, 2012. **58**(5): p. 854-68.
- 11
- 12 9. Daly, C.H., et al., *A systematic review of statistical methods used in constructing pediatric*
- 13 *reference intervals.* Clinical Biochemistry, 2013. **46**(13–14): p. 1220-1227.
- 14
- 15 10. Kohse, K.P., *KiGGS — The German survey on children's health as data base for reference*
- 16 *intervals and beyond.* Clinical Biochemistry, 2014. **47**(9): p. 742-743.
- 17
- 18 11. Estey, M.P., et al., *CLSI-based transference of the CALIPER database of pediatric reference*
- 19 *intervals from Abbott to Beckman, Ortho, Roche and Siemens Clinical Chemistry Assays:*
- 20 *Direct validation using reference samples from the CALIPER cohort.* Clinical Biochemistry,
- 21 2013. **46**(13–14): p. 1197-1219.
- 22
- 23 12. CLSI, *CLSI Releases Guidelines for Defining, Establishing, and Verifying Reference Intervals in*
- 24 *the Clinical Laboratory.* 2008, COMTEX News Network, Inc.
- 25
- 26 13. Monagle, P., et al., *Developmental haemostasis. Impact for clinical haemostasis laboratories.*
- 27 *Thromb Haemost,* 2006. **95**(2): p. 362-72.
- 28
- 29 14. Harris, P.A., et al., *Research Electronic Data Capture (REDCap) - A metadata-driven*
- 30 *methodology and workflow process for providing translational research informatics support.*
- 31 *Journal of biomedical informatics,* 2009. **42**(2): p. 377-381.
- 32
- 33 15. Royston, P. and E.M. Wright, *A method for estimating age-specific reference intervals*
- 34 *('normal ranges') based on fractional polynomials and exponential transformation.* Journal of
- 35 *the Royal Statistical Society: Series A (Statistics in Society),* 1998. **161**(1): p. 79-101.
- 36
- 37 16. Wei, Y., et al., *Quantile regression methods for reference growth charts.* Statistics in
- 38 *Medicine,* 2006. **25**(8): p. 1369-1382.
- 39
- 40 17. StataCorp. *Stata Statistical Software: Release 15.* 2017. College Station, TX: Stata Crop LP.
- 41
- 42 18. Koerbin, G., J.R. Tate, and A.C.f.C.R.I. on behalf of the, *Harmonising Adult Reference Intervals*
- 43 *in Australia and New Zealand – the Continuing Story.* The Clinical Biochemist Reviews, 2016.
- 44 **37**(3): p. 121-129.
- 45
- 46 19. Ritchie, R.F. and G. Palomaki, *Selecting clinically relevant populations for reference intervals.*
- 47 *Clinical Chemistry And Laboratory Medicine,* 2004. **42**(7): p. 702-709.
- 48
- 49 20. Eugene K. H and James C. B, *Statistical Bases of Reference Values in Laboratory Medicine.,*
- 50 *New York; Marcel Dekker, Inc., 1995.*
- 51
- 52 21. Adeli, K., et al., *The Canadian laboratory initiative on pediatric reference intervals: A CALIPER*
- 53 *white paper.* Crit Rev Clin Lab Sci, 2017. **54**(6): p. 358-413.
- 54
- 55 22. Ridefelt, P., *Pediatric reference intervals - the Swedish experience.* Clin Biochem, 2014. **47**(9):
- 56 p. 740-1.
- 57
- 58 23. Melbourne, T.R.C.s.H. *RCH Specimen collection handbook.* Available from:
- 59 <https://ww2.rch.org.au/specimen/>.
- 60
24. Zierk, J., et al., *Age- and Sex-Specific Dynamics in 22 Hematologic and Biochemical Analytes*
- from Birth to Adolescence.* Clin Chem, 2015. **61**(7): p. 964-973.

## AUTHOR STATEMENT

MH wrote the manuscript, and developed the statistical analysis plan. VK wrote the study protocol, obtained ethics approval for the study, co-wrote the manuscript and is the co-ordinator of the study. SM provided Biochemistry expertise in the design of the study and revised the manuscript. JB

1  
2  
3 provided pathology collection expertise in the design of the study, training for the pathology  
4 collectors and reviewed the manuscript. JC and SD provided support for statistical analysis plan and  
5 reviewed the manuscript. PM conceived the study and contributed to its design and was a major  
6 contributor in writing the manuscript. VI contributed to the design of the study and was a major  
7 contributor in writing the manuscript. All authors read and approved the final manuscript.  
8  
9

## 10 11 12 **FUNDING**

13  
14 This study has been primarily funded by The Royal Children's Hospital Foundation (Proposal ID: 2014  
15 – 233), with supplementary funding from Ortho Diagnostics. In addition, the study received in-kind  
16 reagents from Roche Diagnostics. Funding bodies do not have any input in the design of the study,  
17 sample collection, analysis and interpretation of data and in preparation of the manuscript.  
18  
19

## 20 21 22 **COMPETING INTERESTS**

23  
24 The authors declare that they have no competing interests.  
25

## 26 27 **ACKNOWLEDGEMENTS**

28  
29 The authors are grateful to the parents and children for their participation in this study. The authors  
30 thank members of the Pathology Collection Department of The Royal Children's Hospital for the  
31 consent of participants and collection of samples. The authors acknowledge the contribution of the  
32 members of the anaesthetic and surgical departments of the Royal Children's Hospital, Northern  
33 Hospital and Western Health - Sunshine Hospital, Melbourne, for facilitation of sample collection. In  
34 addition, the authors thank members of the post-natal departments of The Royal Women's Hospital,  
35 Northern Hospital and Western Health, Sunshine Hospital.  
36  
37  
38  
39  
40  
41  
42  
43  
44  
45  
46  
47  
48  
49  
50  
51  
52  
53  
54  
55  
56  
57  
58  
59  
60

**Supplementary table 1:** Questionnaire for assessing inclusion and exclusion criteria.

| Participant/Category                              | Questions / Data fields                                                                                                           |
|---------------------------------------------------|-----------------------------------------------------------------------------------------------------------------------------------|
| All Sample                                        | Study ID                                                                                                                          |
|                                                   | Date of Recruitment                                                                                                               |
|                                                   | Site of Recruitment                                                                                                               |
|                                                   | Date Sample Collected                                                                                                             |
|                                                   | Hospital                                                                                                                          |
|                                                   | UR                                                                                                                                |
|                                                   | First Name                                                                                                                        |
|                                                   | Surname                                                                                                                           |
|                                                   | Date of Birth                                                                                                                     |
|                                                   | Sex                                                                                                                               |
|                                                   | Address                                                                                                                           |
|                                                   | Ethnicity of Mother                                                                                                               |
|                                                   | Ethnicity of Father                                                                                                               |
| Tube Type Collected and Volume of blood collected |                                                                                                                                   |
| Neonates                                          | Gestation                                                                                                                         |
|                                                   | Time of Birth                                                                                                                     |
|                                                   | Day of Bleed                                                                                                                      |
|                                                   | Nature of Delivery                                                                                                                |
|                                                   | Weight                                                                                                                            |
|                                                   | APGAR Score at 5 minutes                                                                                                          |
|                                                   | Feeding Method                                                                                                                    |
|                                                   | Date/Time of Vitamin K                                                                                                            |
|                                                   | Current Medications                                                                                                               |
| Paediatric                                        | Procedure performed                                                                                                               |
|                                                   | Current Medications                                                                                                               |
|                                                   | Clinical Information                                                                                                              |
| Haematology                                       | Does the participant have a presence of coagulation disorders?                                                                    |
|                                                   | Does the participant have a family history of coagulation disorders?                                                              |
|                                                   | Is there participant currently on anticoagulation medication?                                                                     |
| Immunology                                        | Does the participant have a presence of an immune system disorder or immune deficiency syndrome?                                  |
|                                                   | Does the participant have a presence of a genetic disorder?                                                                       |
|                                                   | Does the participant have a presence of a rheumatologic disorder?                                                                 |
|                                                   | Has any family member or relative of your child ever been diagnosed with an immune system disorder or immune deficiency syndrome? |
|                                                   | Has the participant had an infection or a febrile illness within the last 7 days?                                                 |

|              |                                                                                                                                                                |
|--------------|----------------------------------------------------------------------------------------------------------------------------------------------------------------|
|              | Has the participant had a hospital admission for intravenous (IV) antibiotics to clear an infection on more than 2 occasions in life?                          |
|              | Has the participant needed 2 or more months of oral antibiotics more than 2 occasions in their life?                                                           |
|              | Does the participant have a history of a failure to thrive?                                                                                                    |
|              | Has the participant been a recipient of blood products in the last 3 months?                                                                                   |
|              | Has a doctor ever diagnosed your child with food allergy, asthma, eczema or hayfever?                                                                          |
|              | Has anyone in your child's immediate family (that is, your child's parents and/or siblings) ever been diagnosed with food allergy, asthma, eczema or hayfever? |
| Biochemistry | Does the participant have a history of liver and renal disease?                                                                                                |
|              | Does the participant have a presence of endocrine diseases?                                                                                                    |
|              | Does the participant have a presence of metabolic disease?                                                                                                     |
|              | Does the participant have a presence of renal disease?                                                                                                         |
|              | Does the participant have a presence of hepatic disease?                                                                                                       |
|              | Does the participant have a history of failure to thrive?                                                                                                      |

# BMJ Open

**A prospective, cross-sectional study to establish age-specific reference intervals for neonates and children in the setting of clinical biochemistry, immunology and haematology: The HAPPI Kids study protocol**

|                                 |                                                                                                                                                                                                                                                                                                                                                                                                                                                                                                                                                                                                                                                                                                                                                                                                                                                                                                                                                                                                                                                                       |
|---------------------------------|-----------------------------------------------------------------------------------------------------------------------------------------------------------------------------------------------------------------------------------------------------------------------------------------------------------------------------------------------------------------------------------------------------------------------------------------------------------------------------------------------------------------------------------------------------------------------------------------------------------------------------------------------------------------------------------------------------------------------------------------------------------------------------------------------------------------------------------------------------------------------------------------------------------------------------------------------------------------------------------------------------------------------------------------------------------------------|
| Journal:                        | <i>BMJ Open</i>                                                                                                                                                                                                                                                                                                                                                                                                                                                                                                                                                                                                                                                                                                                                                                                                                                                                                                                                                                                                                                                       |
| Manuscript ID                   | bmjopen-2018-025897.R2                                                                                                                                                                                                                                                                                                                                                                                                                                                                                                                                                                                                                                                                                                                                                                                                                                                                                                                                                                                                                                                |
| Article Type:                   | Protocol                                                                                                                                                                                                                                                                                                                                                                                                                                                                                                                                                                                                                                                                                                                                                                                                                                                                                                                                                                                                                                                              |
| Date Submitted by the Author:   | 21-Feb-2019                                                                                                                                                                                                                                                                                                                                                                                                                                                                                                                                                                                                                                                                                                                                                                                                                                                                                                                                                                                                                                                           |
| Complete List of Authors:       | Hoq, Monsurul ; Murdoch Children's Research Institute, Clinical Epidemiology and Biostatistics Unit; The University of Melbourne, Department of Paediatrics<br>Karlaftis, Vicky; Murdoch Children's Research Institute, Haematology Research<br>Mathews, Susan; The Royal Children's Hospital, Department of Biochemistry, Laboratory Services<br>Burgess, Janet; The Royal Children's Hospital, Department of Pathology Collection, Laboratory Services<br>Donath, Susan; Murdoch Children's Research Institute, Clinical Epidemiology and Biostatistics Unit; The University of Melbourne , Department of Paediatrics<br>Carlin, John; Murdoch Children's Research Institute, Clinical Epidemiology and Biostatistics Unit; The University of Melbourne , Department of Paediatrics<br>Monagle, Paul; Murdoch Children's Research Institute, Haematology Research; The University of Melbourne , Department of Paediatrics<br>Ignjatovic, Vera; Murdoch Children's Research Institute, Haematology Research; The University of Melbourne, Department of Paediatrics |
| <b>Primary Subject Heading</b>: | Paediatrics                                                                                                                                                                                                                                                                                                                                                                                                                                                                                                                                                                                                                                                                                                                                                                                                                                                                                                                                                                                                                                                           |
| Secondary Subject Heading:      | Paediatrics                                                                                                                                                                                                                                                                                                                                                                                                                                                                                                                                                                                                                                                                                                                                                                                                                                                                                                                                                                                                                                                           |
| Keywords:                       | PAEDIATRICS, Neonates, Children, Reference Intervals                                                                                                                                                                                                                                                                                                                                                                                                                                                                                                                                                                                                                                                                                                                                                                                                                                                                                                                                                                                                                  |
|                                 |                                                                                                                                                                                                                                                                                                                                                                                                                                                                                                                                                                                                                                                                                                                                                                                                                                                                                                                                                                                                                                                                       |

SCHOLARONE™  
Manuscripts

1  
2  
3 **A prospective, cross-sectional study to establish age-specific reference intervals for neonates and**  
4 **children in the setting of clinical biochemistry, immunology and haematology: The HAPPI Kids**  
5 **study protocol**  
6  
7  
8  
9

10  
11 **Corresponding Author**

12 Associate Professor Vera Ignjatovic, PhD, B.Sc. (Hons)

13 Co-Group Leader, Haematology Research, Murdoch Children's Research Institute

14 Principal Fellow, Department of Paediatrics, The University of Melbourne  
15  
16  
17  
18

19 Address

20 Haematology Research, Murdoch Children's Research Institute

21 The Royal Children's Hospital

22 50 Flemington Road, Parkville, Victoria, 3052, Australia

23 Tel: +61 3 99366520, Email: vera.ignjatovic@mcri.edu.au  
24  
25  
26  
27  
28  
29

30 **Co-authors**

31 Monsurul Hoq

32 Clinical Epidemiology and Biostatistics Unit, Murdoch Children's Research Institute, Parkville,  
33 Australia; Department of Paediatrics, The University of Melbourne, Parkville, Australia.  
34  
35  
36

37 Email: monsurul.hoq@mcri.edu.au  
38  
39

40 Vicky Karlaftis

41 Haematology Research, Murdoch Children's Research Institute, Parkville, Australia.

42 Email: vasiliki.karlaftis@mcri.edu.au  
43  
44  
45  
46  
47

48 Sue Mathews

49 Department of Biochemistry, Laboratory Services, The Royal Children's Hospital, Australia.

50 Email: Susan.Matthews@rch.org.au  
51  
52  
53

54 Janet Burgess

55 Department of Pathology Collection, Laboratory Services, The Royal Children's Hospital, Parkville,  
56 Australia.  
57

58 Email: Janet.Burgess@rch.org.au  
59  
60



1  
2  
3 Susan Donath

4 Clinical Epidemiology and Biostatistics Unit, Murdoch Children's Research Institute; Parkville,  
5 Australia; Department of Paediatrics, The University of Melbourne; Parkville, Australia.  
6  
7

8 Email: Susan.donath@mcri.edu.au  
9

10  
11 John Carlin

12 Clinical Epidemiology and Biostatistics Unit, Murdoch Children's Research Institute, Parkville,  
13 Australia; Department of Paediatrics, The University of Melbourne, Parkville, Australia.  
14

15 Email: john.carlin@mcri.edu.au  
16  
17

18  
19 Paul Monagle

20 Haematology Research, Murdoch Children's Research Institute, Parkville, Australia; Department of  
21 Paediatrics, The University of Melbourne, Parkville, Australia  
22

23 Email: Paul.Monagle@rch.org.au  
24  
25

26  
27 Vera Ignjatovic

28 Haematology Research, Murdoch Children's Research Institute, Parkville, Australia; Department of  
29 Paediatrics, The University of Melbourne, Parkville, Australia.  
30

31 Email: vera.ignjatovic@mcri.edu.au  
32  
33

34  
35  
36 **WORD COUNT: 3746**  
37  
38  
39  
40  
41  
42  
43  
44  
45  
46  
47  
48  
49  
50  
51  
52  
53  
54  
55  
56  
57  
58  
59  
60

**ABSTRACT****Introduction:**

The clinical interpretation of laboratory tests is reliant on reference intervals. However, the accuracy of a reference interval is dependent on the selected reference population, and in paediatrics, the ability of the reference interval to reflect changes associated with growth and age, as well as sex and ethnicity. Differences in reagent formulations, methodologies, and analysers can also impact on a reference interval. To date, no direct comparison of reference intervals for common analytes using different analysers in children has been published. The HAPPI Kids study aims to establish age-appropriate reference intervals for commonly used analytes in the routine clinical care of neonates and children, and to determine the feasibility of paediatric reference interval harmonisation by comparing age-appropriate reference intervals in different analysers for multiple analytes.

**Methods and analysis:**

The HAPPI Kids study is a prospective cross-sectional study, collecting paediatric blood samples for analysis of commonly requested biochemical, immunological and haematological tests. Venous blood samples are collected from healthy premature neonates (32 to 36 weeks gestation), term neonates (from birth to a maximum of 72 hours post-birth), and children aged 30 days to  $\leq 18$  years (undergoing minor day surgical procedures). Blood samples are processed according to standard laboratory procedures and, if not processed immediately, stored at  $-80^{\circ}\text{C}$ . A minimum of 20 samples is analysed for every analyte for neonates and then each year of age until 18 years. Analytical testing is performed according to the standard operating procedures used for clinical samples. Where possible, sample aliquots from the same patients are analysed for an analyte across multiple commercially available analysers.

**Ethics and dissemination:**

The study protocol was approved by The Royal Children's Hospital, Melbourne, Ethics in Human Research Committee (34183 A). The study findings will be published in peer-reviewed journals and shared with clinicians, laboratory-scientists and laboratories.

**Keywords:** paediatrics, neonates, children, reference intervals

## STRENGTHS AND LIMITATIONS OF THIS STUDY

1. The prospective design of the study ensures blood samples are collected from healthy neonates and children aged 30 days to  $\leq 18$  years.
2. Aliquots from the same blood sample are tested for common analytes on multiple commercially available analysers allowing direct head to head comparison.
3. Samples are obtained from a minimum of 20 neonates and then for 20 children within each year of age until 18 years with equal numbers of males and females (total 380 samples per analyte).
4. Parametric statistical methods are to be applied for estimating reference intervals that vary continuously with increasing age.
5. Changes in analytes associated with age are based on samples collected cross-sectionally not based on individuals followed longitudinally.

## INTRODUCTION

Reference intervals are important for the correct interpretation of clinical laboratory tests and affect the clinical assessment and care of patients. Reference intervals are used for determining normal versus abnormal for a measurement of interest, and are usually defined as a range encompassing 95% of the reference population, where lower and upper limits are 2.5<sup>th</sup> and 97.5<sup>th</sup> centile respectively [1].

Obtaining accurate data from a suitable reference population is an essential element in determining reference intervals, and therefore the characteristics of a reference population need to be matched to a “normal” or a healthy population using strict criteria. However, collecting blood samples from children for different laboratory tests is challenging due to the small blood volume that can be safely collected from children and the ethical concern of obtaining blood from healthy children [2]. For these reasons, previously documented paediatric reference interval studies are frequently based on retrospective analysis of laboratory data, prospective sample collection from school children in the community (i.e. limited age groups) or from paediatric hospitals where children are undergoing minor elective surgery [3-7]. Regardless of how the samples are collected, very few of these studies have included neonates through to 18 years of age [8].

In children, development and growth are among the key challenges in determining reference intervals for different analytes [2]. The dynamic nature of different analytes as children grow and develop influences the representation of paediatric reference intervals, which have often historically been

1  
2  
3 established or partitioned for different age-ranges [8, 9]. This approach can often lead to misdiagnosis,  
4 especially when the age of the child that is being investigated is in close proximity to the borders of  
5 the partitions. For example, a child aged three years and 360 days may have clinical results that would  
6 be classified as outside the reference interval of 0 to 4 years for a blood test of interest, but within the  
7 reference interval for children aged 4 to 9 years. Hence, the difference of 5 days results in the test  
8 result being labelled as abnormal. Misdiagnosis leads to repeated blood tests for the child, increased  
9 utilisation of health services, and is often associated with anxiety for parents and children alike. The  
10 determination of the age-specific partition points has often been arbitrary and often there is not an  
11 even distribution of the number of reference subjects included across different partitions. For these  
12 and other reasons, the process of determining age-specific reference intervals for different analytes  
13 based on the artificial partitioning of age has been found to be problematic [4]. A preferred approach,  
14 which addresses the age-related changes in analyte levels, is to construct age-appropriate reference  
15 intervals considering age as a continuous variable [1, 4, 10].

16  
17 The laboratory test results for most analytes are dependent on the analyser and reagents used for  
18 analysis and therefore, analyser- and reagent-specific reference intervals should be determined. In  
19 several studies, mathematical algorithms or “transference” mechanisms have been applied to  
20 compare and construct reference intervals for different analysers based on the reference values for  
21 one specific analyser [11, 12]. However, to date, direct comparison of the reference intervals for  
22 common analytes using different analysers has not been undertaken in neonates and children.

23  
24 The Harmonizing Age Pathology Parameters in Kids (HAPPI Kids) study is designed to address the  
25 existing gaps in reference interval studies with prospectively collected blood samples from healthy  
26 neonates and children, from birth until 18 years of age.

## 27 28 29 30 31 32 33 34 35 36 37 38 39 40 41 42 43 44 45 46 47 **METHODS AND ANALYSIS**

### 48 49 **The HAPPI Kids study: Aims**

- 50  
51 • Establish age-appropriate reference intervals for commonly used analytes in clinical practice  
52 in the setting of neonates and children.
- 53  
54 • Determine whether analyser characteristics alter age-appropriate reference intervals for  
55 multiple analytes, in order to determine whether paediatric reference intervals can be  
56 harmonised.
- 57  
58  
59  
60

## Study design

The HAPPI Kids study is a prospective cross-sectional study for the collection of paediatric blood samples for commonly requested biochemical, immunological and haematological analysis.

## Study subjects

The study subjects consist of healthy premature neonates (32 to 36 weeks gestation), term neonates (from birth up to a maximum of 72 hours post-birth and children aged 30 days to 18 years (undergoing minor day surgical procedures).

## Participant recruitment and sample collection:

Participant recruitment commenced in February 2015 in four major public hospitals in Melbourne, Australia. Parents or guardians of eligible study participants are approached by Pathology Collection staff at each site and written consent is obtained following a verbal and written explanation of the study and participation requirements. Following patient consent, the Pathology Collection staff interview the parents or guardian using the study questionnaire (supplementary table 1) to confirm study inclusion and exclusion criteria status (table 1). In addition, the child's medical record is reviewed to assess and document the child's general health.

Three distinct routes of patient recruitment are utilised:

1. Pre-term neonatal samples are collected from "healthy" neonates about to be discharged from post-natal wards, born at 32 to 36 weeks gestation, at The Royal Women's Hospital. Samples are collected in the first three days of life via direct venepuncture, using a 23-gauge needle, into required blood collection tubes. The pre-term neonates do not have any systemic abnormalities i.e. underlying diseases and comorbidities, abnormal foetal monitoring and do not require any mechanical ventilation.
2. Term neonatal samples are collected from "healthy" term neonates about to be discharged from post-natal wards following routine intramuscular administration of one milligram of vitamin K in the delivery suites at The Royal Women's Hospital, Northern Health and Western Health - Sunshine Hospital. Samples are collected from birth up to a maximum of 72 hours post-birth in hospital via direct venepuncture, using a 23-gauge needle into the required blood collection tubes (Sarstedt). To minimise the number of blood collection procedures performed, the venous sample is also utilised for application to the routine newborn screening Guthrie card.

- 1  
2  
3 3. Blood samples from healthy children aged 30 days to 18 years are collected at The Royal  
4 Children's Hospital, Northern Hospital and Western Health - Sunshine Hospital. The samples  
5 are obtained from "healthy" children prior to minor elective day surgery (e.g. circumcision).  
6  
7 Other than elective surgery, these children are deemed "healthy" and are not receiving any  
8 medications. All children are fasted before their elective surgery.  
9  
10  
11

12 Only one attempt to collect blood per participant, per sample is made during the HAPPI Kids study.  
13 Blood samples are collected into specific tubes required by the analyser manufacturer depending on  
14 the analytes being tested (e.g. serum vs citrate). The participant recruitment and sample collection  
15 are currently on going.  
16  
17  
18  
19

20 **Table 1:** Summary of the inclusion and exclusion criteria at screening  
21

|                           | Inclusion criteria                                                                                                                                                                                                                                           | Exclusion criteria (any one)                                                                                                                                                          |
|---------------------------|--------------------------------------------------------------------------------------------------------------------------------------------------------------------------------------------------------------------------------------------------------------|---------------------------------------------------------------------------------------------------------------------------------------------------------------------------------------|
| <b>Age groups</b>         |                                                                                                                                                                                                                                                              |                                                                                                                                                                                       |
| <b>Premature neonates</b> | <ul style="list-style-type: none"> <li>Gestational age of 32 to 36 weeks</li> <li>Generally healthy</li> </ul>                                                                                                                                               | <ul style="list-style-type: none"> <li>Presence of systemic abnormalities</li> <li>Requires interpreter</li> </ul>                                                                    |
| <b>Term neonates</b>      | <ul style="list-style-type: none"> <li>From birth up to the maximum 72 hours post-birth</li> <li>Gestational age <math>\geq 37</math> weeks</li> <li>Weight <math>\geq 2500</math> grams</li> <li>APGAR Score <math>\geq 7</math> at five minutes</li> </ul> |                                                                                                                                                                                       |
| <b>Paediatric</b>         | <ul style="list-style-type: none"> <li>Attending hospital for minor elective surgery requiring general anaesthetic (30 days to 18 years) OR volunteer to participate in the study after seeing a flyer related to the study (15 to 18 years)</li> </ul>      |                                                                                                                                                                                       |
| <b>Category</b>           |                                                                                                                                                                                                                                                              |                                                                                                                                                                                       |
| <b>Haematology</b>        |                                                                                                                                                                                                                                                              | <ul style="list-style-type: none"> <li>Presence of coagulation disorders</li> <li>Family history of coagulation disorders</li> <li>Currently on anticoagulation medication</li> </ul> |
| <b>Immunology</b>         |                                                                                                                                                                                                                                                              | <ul style="list-style-type: none"> <li>Presence of immune system disorder or immune deficiency syndrome</li> <li>Presence of genetic disorder</li> </ul>                              |

|                     |  |                                                                                                                                                                                                                                                                                                                                                                                                                                                                                                                                                                                                                                                                                                                                                                        |
|---------------------|--|------------------------------------------------------------------------------------------------------------------------------------------------------------------------------------------------------------------------------------------------------------------------------------------------------------------------------------------------------------------------------------------------------------------------------------------------------------------------------------------------------------------------------------------------------------------------------------------------------------------------------------------------------------------------------------------------------------------------------------------------------------------------|
|                     |  | <ul style="list-style-type: none"> <li>• Presence of rheumatologic disorder</li> <li>• Family history of rheumatologic disorder or immune deficiency syndrome</li> <li>• Infection or a febrile illness within the last 7 days</li> <li>• Infection or a febrile illness within the last 4 weeks</li> <li>• Hospital admission for intravenous (IV) antibiotics to clear an infection on more than 2 occasions in life</li> <li>• Has needed 2 or more months of oral antibiotics more than 2 occasions in their life</li> <li>• Failure to thrive</li> <li>• Recipient of blood products in the last 3 months</li> <li>• Diagnosed with food allergy, asthma, eczema or hayfever</li> <li>• Family history of food allergy, asthma, eczema or food allergy</li> </ul> |
| <b>Biochemistry</b> |  | <ul style="list-style-type: none"> <li>• History of liver and renal disease</li> <li>• Presence of endocrine diseases</li> <li>• Presence of metabolic disease</li> <li>• Presence of renal disease</li> <li>• Presence of hepatic disease</li> <li>• Failure to thrive</li> </ul>                                                                                                                                                                                                                                                                                                                                                                                                                                                                                     |

### Sample size

A minimum of 20 samples is collected for 19 specific age groups e.g. neonates and every year of life from 30 days to 18 years [1]. For the biochemical and haematological parameters, a total of 380 samples are analysed. For the immunological analysis, the number of age groups is increased from 19 to 22 (i.e. 1 to 2 months, 2 to 6 months, 6 to 9 months, 9 to 12 months, 12 to 18 months, 18 to 24 months, and every year of life from 3 years to 18 years), equating to a total of 440 samples. For pre-term neonates, a total of 100 samples are collected to facilitate analysis of 20 samples for each week of gestation from 32 to 36 weeks.

The sample size of 380 or 440 for estimating 95% reference intervals of an analyte using parametric methods with samples distributed uniformly across 30 days to < 18 years is considered adequate based on the approach proposed by Royston [1]. Using a formula for the approximate standard error of the reference limit at the mean value of age, he suggested 292 as a suitable sample size for

constructing a 95% reference intervals based on restricting the standard error of the limits of the resulting reference intervals to be no more than 10 percent of the residual standard deviation from the parametric model [1].

### Sample processing and storage

Samples are thawed as per standard clinical laboratory practice for the analyte in question. There are no repeat freeze-thaw cycles for any of the samples. For some analytes the samples are processed immediately and not frozen, within the same time frame and conditions under which clinical samples would be handled. Analytes that can be frozen will be tested in batches. Testing will be done with samples from all ages included in each batch with randomly assigned orders of testing to avoid any batch to batch bias.

For biochemistry analytes, samples are collected into S-Monovette serum gel tubes (Sarstedt), centrifuged at 5000rpm and 6 °C for 5 minutes, separated and stored in 400 µL aliquots at -80 °C within four hours of collection.

For immunology analytes, samples are collected into either S-Monovette serum gel tubes (Sarstedt), or S-Monovette neutral tubes (Sarstedt), depending on the downstream tests. The samples are spun at 5000rpm and 6 °C for 5 minutes, separated and the resultant serum stored in 400µL aliquots at -80 °C within four hours of collection.

For haematology analytes, samples are collected into S-Monovette citrate 3.2% tubes (Sarstedt). The samples are centrifuged at 3800rpm at room temperature for 5 minutes, and plasma is stored in 500µL aliquots at -80 °C within four hours of collection, using a previously established collection protocol [13].

Samples utilised for determination of blood groups (ABO) and the thalassemia screen are collected into 500uL S-Monovette EDTA tubes and processed in the laboratory within 24 hours of collection.

Cell count samples are collected in S-Monovette EDTA tubes (Sarstedt) and processed by the laboratory within 3 hours of collection.

The details of blood tubes used in sample collection is provided in table 2.

**Table 2:** Blood tubes used in sample collection

| Analytes category | Tube Type | Manufacturer | Subtype | Volume | Product Code | Age group |
|-------------------|-----------|--------------|---------|--------|--------------|-----------|
|-------------------|-----------|--------------|---------|--------|--------------|-----------|



|              |                 |          |             |        |             |                        |
|--------------|-----------------|----------|-------------|--------|-------------|------------------------|
| Biochemistry | SST             | Sarstedt | S-Monovette | 7.5 mL | 01.1602.001 | Neonate and Paediatric |
| Haematology  | EDTA            | Sarstedt | S-Monovette | 2.7 mL | 05.1167.001 | Paediatric             |
|              | EDTA            | Sarstedt | Micro Tube  | 0.5 mL | 41.1395.002 | Neonate                |
|              | Sodium Citrate  | Sarstedt | S-Monovette | 3 mL   | 05.1165.100 | Paediatric             |
|              | Sodium Citrate  | Sarstedt | S-Monovette | 1.4 mL | 06.1668.100 | Neonate                |
|              | Lithium Heparin | Sarstedt | S-Monovette | 7.5 mL | 01.1608.001 | Paediatric             |
|              | Lithium Heparin | Sarstedt |             | 0.5 mL | 20.1345     | Neonate                |
| Immunology   | SST             | Sarstedt | S-Monovette | 7.5 mL | 01.1602.001 | Neonate and Paediatric |
|              | Neutral         | Sarstedt | S-Monovette | 7.5 mL | 01.1728.001 | Neonate and Paediatric |

### Sample testing

Blood samples collected from the study participants are tested according to documented and accredited standard operating procedures used for the testing of patient samples within the participating laboratories. The biochemical, immunological and haematological analytes tested are listed in table 3. Where indicated (\*), sample aliquots from the same patient are tested for the same analyte using different automated analysers commonly in clinical use to facilitate direct head to head comparison. In addition, where indicated in table 3 (†), aliquots of the same sample are tested in different laboratories using the same analyser type and test method. The sample testing is currently ongoing.

**Table 3:** List of analytes tested for the HAPPI Kids study.

| Biochemical                | Immunological      | Haematological                                                        |
|----------------------------|--------------------|-----------------------------------------------------------------------|
| Sodium <sup>**†</sup>      | Immunoglobulin G*  | Factors: XII, XI, IX, X, II, VII, VIII, V                             |
| Potassium <sup>**†</sup>   | Immunoglobulin A*  | Inhibitors: Protein C, Protein S, Antithrombin, Alpha-2-macroglobulin |
| Chloride <sup>**†</sup>    | Immunoglobulin M*  | Von Willebrand factor                                                 |
| Bicarbonate <sup>**†</sup> | Rheumatoid factor* | Collegen binding assay                                                |

|                                                |                                           |                                          |
|------------------------------------------------|-------------------------------------------|------------------------------------------|
| Urea**†                                        | Complement component 3*                   | Ristocetin cofactor assay                |
| Creatinine **†                                 | Complement component 4*                   | Activated Partial Thromboplastin Time †  |
| Total Bilirubin †                              | Cystatin C*                               | Prothrombin Time †                       |
| Conjugated Bilirubin**†                        | ANTI-STREPTOLYSIN O TEST*                 | Fibrinogen †                             |
| Alkaline Phosphate**†                          | Thyroid peroxidase*                       | Thrombin clotting time                   |
| Aspartate Aminotransferase **†                 | Thyroglobulin*                            | D-Dimers †                               |
| Alanine Aminotransferase **†                   | Iron*                                     | Full Blood Examination and Reticulocytes |
| Gamma-Glutamyl Transferase **†                 | Ferritin* †                               | Red Cell Folate                          |
| Total Protein**                                | Transferrin*                              | Glucose-6-phosphate dehydrogenase        |
| Albumin**                                      | Antinuclear antibody                      | Active B12                               |
| Calcium**†                                     | Soluble FAS Ligand                        | Total Homocysteine                       |
| Magnesium**†                                   | Soluble CD25                              | Total B12                                |
| Phosphate**†                                   | Immunoglobulin E                          | Serum Folate                             |
| Lactate dehydrogenase**                        | Classic Haemolytic Complement Pathway     |                                          |
| Creatine Kinase **                             | Alternative Haemolytic Complement Pathway |                                          |
| Lipase**                                       | Mannose-binding lectin Complement Pathway |                                          |
| Amylase**                                      |                                           |                                          |
| Uric Acid**                                    |                                           |                                          |
| Triglycerides **                               |                                           |                                          |
| Cholesterol**                                  |                                           |                                          |
| High-density lipoprotein**                     |                                           |                                          |
| Thyroid Stimulating Hormone **                 |                                           |                                          |
| Free Thyroxine **                              |                                           |                                          |
| Free Triiodothyronine **                       |                                           |                                          |
| Anti-Müllerian hormone *                       |                                           |                                          |
| Oestradiol*                                    |                                           |                                          |
| Sex hormone binding globulin *                 |                                           |                                          |
| Dehydroepiandrosterone – Sulphate*             |                                           |                                          |
| Cortisol*                                      |                                           |                                          |
| Growth Hormone*                                |                                           |                                          |
| Testosterone*                                  |                                           |                                          |
| 25-hydroxyvitamin D*                           |                                           |                                          |
| High Sensitivity Oestradiol*                   |                                           |                                          |
| Androstenedione*                               |                                           |                                          |
| 17 $\alpha$ -Hydroxyprogesterone *             |                                           |                                          |
| Insulin-like growth factor 1*                  |                                           |                                          |
| Insulin-like growth factor-binding protein-3 * |                                           |                                          |

\* Sample aliquots from the same patient are tested for the same analyte using different automated analysers in common clinical use to facilitate direct head to head comparison.

+ Aliquots of the same sample are tested in different laboratories using the same analyser type and test method.

1  
2  
3  
4 † Samples from pre term children are tested.  
5

### 6 7 **Data management system**

8  
9 Study data are collected and managed using the REDCap (Research Electronic Data Capture)  
10 electronic data capture system hosted at the Murdoch Children's Research Institute [14]. REDCap is  
11 a secure, web-based application designed to support data capture for research studies, providing: 1)  
12 an intuitive interface for validated data entry; 2) audit trails for tracking data manipulation and  
13 export procedures; 3) automated export procedures for seamless data downloads to common  
14 statistical packages; and 4) procedures for importing data from external sources.  
15  
16  
17  
18

### 19 20 **Data analysis**

21  
22 Test results for different analytes will be plotted according to age in order to identify outliers,  
23 explore normality of distributions, and to assess the association between analyte level and age.  
24 Outliers will to be excluded from analysis following a detailed examination, including visual  
25 inspection, appropriate statistical tests e.g. Tukey's test and assessment of biological implausibility  
26 e.g. haemolysis index for biochemistry samples. Reference intervals will be constructed using  
27 parametric statistical methods in two steps. In the first step, a fractional polynomial regression  
28 model of age will be fitted to the mean of normally distributed or log transformed test results of an  
29 analyte, using sex as a covariate [15]. In the second step, the 2.5<sup>th</sup> and 97.5<sup>th</sup> centiles will be  
30 estimated using quantile regression where the power variables of age from the fractional polynomial  
31 regression model are used as covariates [16]. Potential interaction with sex will be examined. The  
32 95% confidence interval of the reference intervals will be estimated based on the fitted model for  
33 the reference limits. A combination of statistical testing, i.e. goodness of fit and variance component  
34 analysis, and clinical expertise will be used to determine the extent to which the reference intervals  
35 of an analyte based on different analysers can be compared.  
36  
37  
38  
39  
40  
41  
42  
43  
44  
45

46 Stata 15 will be used for data analysis [17].  
47

### 48 49 **Study timeframe**

50  
51 The participant recruitment and sample collection commenced on February 2015 and is expected to  
52 be completed by August 2021. The testing of samples for 30 biochemical analytes has commenced,  
53 while testing of samples for the remaining biochemical analytes and immunological and  
54 haematological analytes are currently on going. We plan to complete the testing of sample by  
55 February 2021.  
56  
57  
58  
59

### 60 **Patient and public involvement**

1  
2  
3 The study was conceived in response to patient complaints about having blood tests done at  
4 community pathology laboratories and their children requiring repeat testing because age-  
5 appropriate normal data was not available. The recruitment and consent processes were piloted and  
6 parental/ child feedback incorporated into the main study protocol. A summary of the results will be  
7 shared by mail with all the participants involved. If any child has a clinically abnormal result the  
8 parents are contacted and appropriate plans for review of the child are made.  
9  
10  
11  
12

### 13 **ETHICS AND DISSEMINATION**

14  
15  
16 The study protocol has been approved (34183 A) by The Royal Children's Hospital, Melbourne, Ethics  
17 in Human Research Committee (HREC) and subsequently approved by the HREC committees of all  
18 participating hospitals including, The Royal Women's Hospital, Northern Health and Western Health  
19 - Sunshine Hospital. The study is primarily supported by The Royal Children's Hospital Foundation  
20 and is based at the Haematology Research Laboratory, Murdoch Children's Research Institute,  
21 Melbourne, Australia.  
22  
23  
24  
25

26  
27 Written consent is obtained from parents or guardians of eligible study participants following a  
28 verbal and written explanation of the study and participation requirements by Pathology Collection  
29 staff at each site after. Less than 3% of the blood volume is collected from a child considering the  
30 amount of blood volume a child has, while only one attempt is made to minimise risk associated  
31 with collecting intravenous blood.  
32  
33  
34  
35

36 Participants' identifying information is replaced by a study number (ID) at recruitment to maintain  
37 confidentiality. This ID is used in all laboratory specimens, evaluation forms, reports and other  
38 records that leaves the site. Electronic data are stored in REDCap which can only be accessed by the  
39 authorised members of the research team. Similarly, paper-based information are stored in a locked  
40 filing cabinet and can only be accessed by the designated persons. The blood samples are stored in  
41 freezers that are only accessible to authorised members of the research team by using their  
42 individual swipe card maintaining a record of who has accessed the samples and at what time.  
43  
44  
45  
46  
47

48 All results that fall outside the existing reference range used by the clinical laboratory are referred  
49 immediately to the study coordinator to determine whether there is any clinical significance that  
50 requires follow-up for the child. If necessary, families are contacted and the blood tests repeated, or  
51 an appropriate referral will be made and the individual will be followed up by the appropriate  
52 specialist.  
53  
54  
55  
56  
57  
58  
59  
60

1  
2  
3 At the conclusion of the study, blood samples collected as part of this study will be destroyed, unless  
4 consent has been given for them to be stored in a biobank located at the Haematology Research  
5 Laboratory for use in future research.  
6  
7

8  
9 The study results will be summarised for submission to peer-reviewed journals. Results will be  
10 shared with participating hospitals and laboratories and presented at local meetings, national and  
11 international conferences.  
12  
13

## 14 **DISCUSSION**

15  
16 Reference intervals are used on a daily basis by clinicians to interpret measurements obtained from  
17 patients [18]. The accuracy and reliability of the reference intervals are highly dependent on the  
18 reference population utilised to define those reference intervals [11, 19]. As recommended by Harris  
19 and Boyd[], the characteristics of the sample from the reference population should be similar to  
20 those of the patients [20]. Paediatric reference intervals established by laboratories using  
21 retrospective data mining techniques provide extensive sample numbers. However, the  
22 representativeness of the population is often compromised by using the laboratory results of  
23 children who were initially referred for a significant clinical investigation [8]. Samples collected  
24 prospectively from pre-schools are useful in constructing reference intervals, but are applicable to  
25 pre-school aged children only [6]. Addressing this issue, the Canadian Initiative in Paediatric  
26 Reference Intervals (CALIPER) and German Health Interview and Examination Survey for Children  
27 and Diagnosis (KiGGS) collected data prospectively using a community-based approach ensuring  
28 representativeness [10, 21, 22]. Similarly, the HAPPI Kids study is one of the very few studies  
29 collecting data prospectively from pre-defined healthy preterm neonates and term neonates from  
30 birth until 72 hours post birth, as well as children from 30 days to 18 years of age.  
31  
32

33 Samples collected for HAPPI Kids utilise paediatric Pathology Collectors with specific skills and  
34 documented competency to collect venous samples from neonates. All collected samples meet RCH  
35 laboratory standard operating procedures for collection and storage as documented in the Specimen  
36 Collection Handbook (SCH) for the analytes [23]. All participating laboratories perform daily quality  
37 control, participated in external quality assurance programs (Royal College of Pathologists of  
38 Australasia Quality Assurance Programs (RCPA QAP)) and were accredited by the National  
39 Association of Testing Authorities (NATA). The prospective design of the HAPPI Kids study also  
40 ensures quality of sample collection, storage and testing in different laboratories.  
41  
42

43 The CLSI recommended sample size for establishing reference intervals for a discrete age group is  
44 120 [12]. However, there is no recommendation for sample size when reference intervals are  
45  
46  
47  
48  
49  
50  
51  
52  
53  
54  
55  
56

1  
2  
3 constructed for continuous age. Few papers have previously reported continuous reference  
4 intervals across childhood and are based on retrospective data mining of samples taken for clinical  
5 purposes over many years [4, 24]. No previous studies have collected prospective samples (which  
6 were not required for clinical management) from neonates and children specifically screened to be a  
7 “well population” for the purpose of developing continuous reference intervals. In that context the  
8 exact numbers required remain unknown. We judged that a similar degree of precision in estimation  
9 of the limits of agreement to that proposed by Royston (1991), i.e. requiring the ratio of the SE of  
10 the estimated limits to be no greater than 10% of the SD of the variation in the population, would be  
11 appropriate in our setting. Planning to recruit 380 children assured us of meeting this criterion. [1].  
12 However, it is our intention to do a simulation study to develop better guidance for appropriate  
13 numbers of samples required to allow reliable characterisation of age-specific analyte dynamics.

14  
15  
16  
17  
18  
19  
20  
21  
22 The direct comparison of reference intervals by analysers is not possible using data mining  
23 techniques, nor when testing remainder of clinically driven samples (due to sample aliquot  
24 limitations). To overcome this problem CALIPER program which initially established reference  
25 intervals using the Abbott ARCHITECT analyser transferred reference intervals in line with Clinical &  
26 Laboratory Standards Institute (CLSI) recommendations by testing only 100 samples on Beckman  
27 Coulter DxC800, Ortho Vitros 5600, Roche Cobas 600 and Siemens Vista 1500 using an algorithm [11,  
28 12]. The study used  $r^2 < 0.70$  as an indicator of non-transference between Abbott ARCHITECT and  
29 another platform and reported several analytes as non-transferable between analysers[11]. The  
30 challenges in transference from the Abbott ARCHITECT to another analyser were discussed by the  
31 authors including the lack of an appropriate number of samples per age group since only 100  
32 samples were tested to predict the linear relationship [11]. The HAPPI Kids study utilises aliquots of  
33 the same blood sample from the same patient and tests the aliquots on different analysers, enabling  
34 the first documented head-to-head comparison between analysers for the age spectrum covering  
35 neonates to children 18 years of age. Therefore, we expect the results of the HAPPI Kids study to be  
36 very useful in improving interpretation of pathology results for neonates and children.

## 37 38 39 40 41 42 43 44 45 46 47 48 49 50 51 52 53 54 55 56 57 58 59 60

1. Royston, P., *Constructing time-specific reference ranges*. *Statistics in Medicine*, 1991. **10**(5): p. 675-690.
2. Coffin, C.M., et al., *Pediatric laboratory medicine: current challenges and future opportunities*. *American Journal Of Clinical Pathology*, 2002. **117**(5): p. 683-690.
3. Adeli, K., *Closing the gaps in pediatric reference intervals: The CALIPER initiative*. *Clinical Biochemistry*, 2011. **44**(7): p. 480-482.
4. Loh, T.P., et al., *Development of paediatric biochemistry centile charts as a complement to laboratory reference intervals*. *Pathology*, 2014. **46**(4): p. 336-43.

5. *Pediatric reference intervals: Critical gap analysis and establishment of a national initiative.* Clinical Biochemistry, 2006. **39**(6): p. 559-560.
6. Southcott, E.K., et al., *Establishment of pediatric reference intervals on a large cohort of healthy children.* Clinica Chimica Acta, 2010. **411**(19–20): p. 1421-1427.
7. Shaw, J.L.V., et al., *Validity of establishing pediatric reference intervals based on hospital patient data: A comparison of the modified Hoffmann approach to CALIPER reference intervals obtained in healthy children.* Clinical Biochemistry, 2014. **47**(3): p. 166-172.
8. Colantonio, D.A., et al., *Closing the gaps in pediatric laboratory reference intervals: a CALIPER database of 40 biochemical markers in a healthy and multiethnic population of children.* Clin Chem, 2012. **58**(5): p. 854-68.
9. Daly, C.H., et al., *A systematic review of statistical methods used in constructing pediatric reference intervals.* Clinical Biochemistry, 2013. **46**(13–14): p. 1220-1227.
10. Kohse, K.P., *KiGGS — The German survey on children's health as data base for reference intervals and beyond.* Clinical Biochemistry, 2014. **47**(9): p. 742-743.
11. Estey, M.P., et al., *CLSI-based transference of the CALIPER database of pediatric reference intervals from Abbott to Beckman, Ortho, Roche and Siemens Clinical Chemistry Assays: Direct validation using reference samples from the CALIPER cohort.* Clinical Biochemistry, 2013. **46**(13–14): p. 1197-1219.
12. CLSI, *CLSI Releases Guidelines for Defining, Establishing, and Verifying Reference Intervals in the Clinical Laboratory.* 2008, COMTEX News Network, Inc.
13. Monagle, P., et al., *Developmental haemostasis. Impact for clinical haemostasis laboratories.* Thromb Haemost, 2006. **95**(2): p. 362-72.
14. Harris, P.A., et al., *Research Electronic Data Capture (REDCap) - A metadata-driven methodology and workflow process for providing translational research informatics support.* Journal of biomedical informatics, 2009. **42**(2): p. 377-381.
15. Royston, P. and E.M. Wright, *A method for estimating age-specific reference intervals ('normal ranges') based on fractional polynomials and exponential transformation.* Journal of the Royal Statistical Society: Series A (Statistics in Society), 1998. **161**(1): p. 79-101.
16. Wei, Y., et al., *Quantile regression methods for reference growth charts.* Statistics in Medicine, 2006. **25**(8): p. 1369-1382.
17. StataCorp. *Stata Statistical Software: Release 15.* 2017. Colleague Station, TX: Stata Crop LP.
18. Koerbin, G., J.R. Tate, and A.C.f.C.R.I. on behalf of the, *Harmonising Adult Reference Intervals in Australia and New Zealand – the Continuing Story.* The Clinical Biochemist Reviews, 2016. **37**(3): p. 121-129.
19. Ritchie, R.F. and G. Palomaki, *Selecting clinically relevant populations for reference intervals.* Clinical Chemistry And Laboratory Medicine, 2004. **42**(7): p. 702-709.
20. Eugene K. H and James C. B., *Statistical Bases of Reference Values in Laboratory Medicine.*, New York; Marcel Dekker, Inc., 1995.
21. Adeli, K., et al., *The Canadian laboratory initiative on pediatric reference intervals: A CALIPER white paper.* Crit Rev Clin Lab Sci, 2017. **54**(6): p. 358-413.
22. Ridefelt, P., *Pediatric reference intervals - the Swedish experience.* Clin Biochem, 2014. **47**(9): p. 740-1.
23. Melbourne, T.R.C.s.H. *RCH Specimen collection handbook.* Available from: <https://ww2.rch.org.au/specimen/>.
24. Zierk, J., et al., *Age- and Sex-Specific Dynamics in 22 Hematologic and Biochemical Analytes from Birth to Adolescence.* Clin Chem, 2015. **61**(7): p. 964-973.

## AUTHOR STATEMENT

1  
2  
3 MH wrote the manuscript, and developed the statistical analysis plan. VK wrote the study protocol,  
4 obtained ethics approval for the study, co-wrote the manuscript and is the co-ordinator of the study.  
5 SM provided Biochemistry expertise in the design of the study and revised the manuscript. JB  
6 provided pathology collection expertise in the design of the study, training for the pathology  
7 collectors and reviewed the manuscript. JC and SD provided support for statistical analysis plan and  
8 reviewed the manuscript. PM conceived the study and contributed to its design and was a major  
9 contributor in writing the manuscript. VI contributed to the design of the study and was a major  
10 contributor in writing the manuscript. All authors read and approved the final manuscript.

## 17 **FUNDING**

18  
19 This study has been primarily funded by The Royal Children's Hospital Foundation (Proposal ID: 2014  
20 – 233), with supplementary funding from Ortho Diagnostics. In addition, the study received in-kind  
21 reagents from Roche Diagnostics. Funding bodies do not have any input in the design of the study,  
22 sample collection, analysis and interpretation of data and in preparation of the manuscript.

## 27 **COMPETING INTERESTS**

28  
29 The authors declare that they have no competing interests.

## 32 **ACKNOWLEDGEMENTS**

33  
34 The authors are grateful to the parents and children for their participation in this study. The authors  
35 thank members of the Pathology Collection Department of The Royal Children's Hospital for the  
36 consent of participants and collection of samples. The authors acknowledge the contribution of the  
37 members of the anaesthetic and surgical departments of the Royal Children's Hospital, Northern  
38 Hospital and Western Health - Sunshine Hospital, Melbourne, for facilitation of sample collection. In  
39 addition, the authors thank members of the post-natal departments of The Royal Women's Hospital,  
40 Northern Hospital and Western Health, Sunshine Hospital.



**Supplementary table 1:** Questionnaire for assessing inclusion and exclusion criteria.

| Participant/Category                              | Questions / Data fields                                                                                                           |
|---------------------------------------------------|-----------------------------------------------------------------------------------------------------------------------------------|
| All Sample                                        | Study ID                                                                                                                          |
|                                                   | Date of Recruitment                                                                                                               |
|                                                   | Site of Recruitment                                                                                                               |
|                                                   | Date Sample Collected                                                                                                             |
|                                                   | Hospital                                                                                                                          |
|                                                   | UR                                                                                                                                |
|                                                   | First Name                                                                                                                        |
|                                                   | Surname                                                                                                                           |
|                                                   | Date of Birth                                                                                                                     |
|                                                   | Sex                                                                                                                               |
|                                                   | Address                                                                                                                           |
|                                                   | Ethnicity of Mother                                                                                                               |
|                                                   | Ethnicity of Father                                                                                                               |
| Tube Type Collected and Volume of blood collected |                                                                                                                                   |
| Neonates                                          | Gestation                                                                                                                         |
|                                                   | Time of Birth                                                                                                                     |
|                                                   | Day of Bleed                                                                                                                      |
|                                                   | Nature of Delivery                                                                                                                |
|                                                   | Weight                                                                                                                            |
|                                                   | APGAR Score at 5 minutes                                                                                                          |
|                                                   | Feeding Method                                                                                                                    |
|                                                   | Date/Time of Vitamin K                                                                                                            |
|                                                   | Current Medications                                                                                                               |
| Paediatric                                        | Procedure performed                                                                                                               |
|                                                   | Current Medications                                                                                                               |
|                                                   | Clinical Information                                                                                                              |
| Haematology                                       | Does the participant have a presence of coagulation disorders?                                                                    |
|                                                   | Does the participant have a family history of coagulation disorders?                                                              |
|                                                   | Is there participant currently on anticoagulation medication?                                                                     |
| Immunology                                        | Does the participant have a presence of an immune system disorder or immune deficiency syndrome?                                  |
|                                                   | Does the participant have a presence of a genetic disorder?                                                                       |
|                                                   | Does the participant have a presence of a rheumatologic disorder?                                                                 |
|                                                   | Has any family member or relative of your child ever been diagnosed with an immune system disorder or immune deficiency syndrome? |
|                                                   | Has the participant had an infection or a febrile illness within the last 7 days?                                                 |

|              |                                                                                                                                                                |
|--------------|----------------------------------------------------------------------------------------------------------------------------------------------------------------|
|              | Has the participant had a hospital admission for intravenous (IV) antibiotics to clear an infection on more than 2 occasions in life?                          |
|              | Has the participant needed 2 or more months of oral antibiotics more than 2 occasions in their life?                                                           |
|              | Does the participant have a history of a failure to thrive?                                                                                                    |
|              | Has the participant been a recipient of blood products in the last 3 months?                                                                                   |
|              | Has a doctor ever diagnosed your child with food allergy, asthma, eczema or hayfever?                                                                          |
|              | Has anyone in your child's immediate family (that is, your child's parents and/or siblings) ever been diagnosed with food allergy, asthma, eczema or hayfever? |
| Biochemistry | Does the participant have a history of liver and renal disease?                                                                                                |
|              | Does the participant have a presence of endocrine diseases?                                                                                                    |
|              | Does the participant have a presence of metabolic disease?                                                                                                     |
|              | Does the participant have a presence of renal disease?                                                                                                         |
|              | Does the participant have a presence of hepatic disease?                                                                                                       |
|              | Does the participant have a history of failure to thrive?                                                                                                      |
