# Supplementary material for: A prospective, cross-sectional study to establish age-specific reference intervals for neonates and children in the setting of clinical biochemistry, immunology and haematology: the HAPPI Kids study protocol
Source: PubMed Central journal article supplement — BMJ Open. 2019 Apr 3;9(4):e025897. doi: 10.1136/bmjopen-2018-025897 (PMC6500200; doi:10.1136/bmjopen-2018-025897), 2019-04-03
Supplement: bmjopen-2018-025897supp001.pdf [file bmjopen-2018-025897supp001.pdf]

**Supplementary table 1:** Questionnaire for assessing inclusion and exclusion criteria.

| <b>Participant/Category</b> | <b>Questions / Data fields</b>                                                                                                    |
|-----------------------------|-----------------------------------------------------------------------------------------------------------------------------------|
| All Sample                  | Study ID                                                                                                                          |
|                             | Date of Recruitment                                                                                                               |
|                             | Site of Recruitment                                                                                                               |
|                             | Date Sample Collected                                                                                                             |
|                             | Hospital                                                                                                                          |
|                             | UR                                                                                                                                |
|                             | First Name                                                                                                                        |
|                             | Surname                                                                                                                           |
|                             | Date of Birth                                                                                                                     |
|                             | Sex                                                                                                                               |
|                             | Address                                                                                                                           |
|                             | Ethnicity of Mother                                                                                                               |
|                             | Ethnicity of Father                                                                                                               |
|                             | Tube Type Collected and Volume of blood collected                                                                                 |
| Neonates                    | Gestation                                                                                                                         |
|                             | Time of Birth                                                                                                                     |
|                             | Day of Bleed                                                                                                                      |
|                             | Nature of Delivery                                                                                                                |
|                             | Weight                                                                                                                            |
|                             | APGAR Score at 5 minutes                                                                                                          |
|                             | Feeding Method                                                                                                                    |
|                             | Date/Time of Vitamin K                                                                                                            |
|                             | Current Medications                                                                                                               |
| Paediatric                  | Procedure performed                                                                                                               |
|                             | Current Medications                                                                                                               |
|                             | Clinical Information                                                                                                              |
| Haematology                 | Dose the participant have a presence of coagulation disorders?                                                                    |
|                             | Does the participant have a family history of coagulation disorders?                                                              |
|                             | Is there participant currently on anticoagulation medication?                                                                     |
| Immunology                  | Does the participant have a presence of an immune system disorder or immune deficiency syndrome?                                  |
|                             | Does the participant have a presence of a genetic disorder?                                                                       |
|                             | Does the participant have a presence of a rheumatologic disorder?                                                                 |
|                             | Has any family member or relative of your child ever been diagnosed with an immune system disorder or immune deficiency syndrome? |
|                             | Has the participant had an infection or a febrile illness within the last 7 days?                                                 |

|              |                                                                                                                                                                |
|--------------|----------------------------------------------------------------------------------------------------------------------------------------------------------------|
|              | Has the participant had a hospital admission for intravenous (IV) antibiotics to clear an infection on more than 2 occasions in life?                          |
|              | Has the participant needed 2 or more months of oral antibiotics more than 2 occasions in their life?                                                           |
|              | Does the participant have a history of a failure to thrive?                                                                                                    |
|              | Has the participant been a recipient of blood products in the last 3 months?                                                                                   |
|              | Has a doctor ever diagnosed your child with food allergy, asthma, eczema or hayfever?                                                                          |
|              | Has anyone in your child's immediate family (that is, your child's parents and/or siblings) ever been diagnosed with food allergy, asthma, eczema or hayfever? |
|              |                                                                                                                                                                |
| Biochemistry | Does the participant have a history of liver and renal disease?                                                                                                |
|              | Does the participant have a presence of endocrine diseases?                                                                                                    |
|              | Does the participant have a presence of metabolic disease?                                                                                                     |
|              | Does the participant have a presence of renal disease?                                                                                                         |
|              | Does the participant have a presence of hepatic disease?                                                                                                       |
|              | Does the participant have a history of failure to thrive?                                                                                                      |
